1 **Osteoblast cell death triggers a pro-osteogenic inflammatory response regulated by**  
2 **reactive oxygen species and glucocorticoid signaling in zebrafish**

3

4 Karina Geurtzen<sup>1</sup>, Ankita Duseja<sup>2</sup>, Franziska Knopf<sup>1,\*</sup>

5

6 <sup>1</sup> CRTD - Center for Regenerative Therapies TU Dresden, Center for Healthy Aging TU

7 Dresden, Germany

8 <sup>2</sup> Department of Oncology and Metabolism, Metabolic Bone Centre, Sorby Wing

9 Northern General Hospital, Sheffield, UK

10

11 \*Corresponding author:

12 franziska.knopf@tu-dresden.de, phone +49 (0) 351 458-82303

13

14 **Key words (3-6)**

15 Zebrafish, osteoblast, macrophage, ablation, glucocorticoid, reactive oxygen species, lineage  
16 tracing

17 **Summary statement:**

18 Laser-mediated osteoblast ablation induces recruitment of tissue-resident macrophages by a  
19 release of reactive oxygen species. The presence of macrophages is required for osteoblasts  
20 to repopulate the lesion site and can be modulated by glucocorticoids.

21 **Abstract**

22 In zebrafish, transgenic labeling approaches, robust regenerative responses and excellent *in*  
23 *vivo* imaging conditions enable precise characterization of immune cell behavior in response  
24 to injury. Here, we monitored osteoblast-immune cell interactions in bone, a tissue which is  
25 particularly difficult to *in vivo* image in tetrapod species. Ablation of individual osteoblasts  
26 leads to recruitment of neutrophils and macrophages in varying numbers, depending on the  
27 extent of the initial insult, and initiates generation of *cathepsinK*<sup>+</sup> osteoclasts from  
28 macrophages. Induced osteoblast death triggers the production of pro-inflammatory  
29 cytokines and reactive oxygen species, which are needed for successful macrophage  
30 recruitment. Excess glucocorticoid signaling as it occurs during the stress response inhibits  
31 macrophage recruitment, maximum speed and changes the macrophages' phenotype. While  
32 osteoblast loss is compensated for within a day by contribution of committed osteoblasts,  
33 macrophages continue to populate the region. Their presence is required for osteoblasts to  
34 fill the lesion site. Our model enables visualization of homeostatic bone repair after  
35 microlesions at single cell resolution and demonstrates a pro-osteogenic function of tissue-  
36 resident macrophages in non-mammalian vertebrates.

37

## 38 Introduction

39 The skeleton and the immune system are close interaction partners, and crosstalk between  
40 both, which is controlled by a set of regulatory molecules (Takayanagi, 2007), influences bone  
41 formation and affects bone regeneration. Excessive and prolonged activation of inflammatory  
42 cells causes bone destructive diseases such as rheumatoid arthritis, while long term  
43 treatment with anti-inflammatory steroids causes osteoporosis (X. Feng & McDonald, 2011;  
44 Takayanagi, 2007). These diseases are associated with pain and fragile bone, and represent  
45 major health issues with strongly increasing incidence in the aging population (Odén et al.,  
46 2015).

47 After injury, recruitment of immune cells is the first step to ensure proper healing and to  
48 prevent the spread of inflammation (Duffield, 2003). Neutrophils dominate the early  
49 inflammatory response, becoming attracted to the respective sites immediately after the  
50 insult, in order to clear debris and recruit macrophages (Kolaczowska & Kubes, 2013). This  
51 recruitment is initiated by various cytokine and chemokine stimuli released by neutrophils  
52 and apoptotic cells at the wound site (Duffield, 2003). Early arriving macrophages display an  
53 inflammatory phenotype and release cytokines to induce tissue degradation and cell  
54 apoptosis (Diez-Roux & Lang, 1997; Leibovich & Ross, 1975). Resolution of inflammation  
55 during later wound healing and tissue repair is promoted by anti-inflammatory macrophages  
56 (Novak & Koh, 2013). In the bone fracture environment, macrophage contribution is essential  
57 for deposition and mineralization of bone matrix (Andrew et al., 1994). In particular,  
58 macrophages initiate bone remodeling by direct interaction with osteoblasts and osteoclasts  
59 in damaged bone (Batoon et al., 2017; Jilka et al., 2007). Moreover, macrophages produce  
60 osteoactive molecules which promote osteogenic differentiation and mineralization (Pettit et  
61 al., 2008; Sinder et al., 2015). Conversely, interaction with osteoblasts can induce cells of the  
62 monocyte/macrophage lineage to differentiate towards osteoclasts (Quinn et al., 1998).

63 Zebrafish has emerged as a powerful animal model to study immunity and inflammation (C.  
64 Hall et al., 2009; Niethammer et al., 2009; Renshaw et al., 2006; Trede et al., 2004), bone  
65 metabolism, remodeling and skeletal disease (Banerji et al., 2016; Carvalho et al., 2017; Hayes  
66 et al., 2013; Kimmel et al., 2010; McNulty et al., 2012; Witten & Huysseune, 2009). Skeletal  
67 and immune cell biology are largely conserved among vertebrates, and zebrafish share the  
68 respective involved cell types, signaling pathways and molecules with mammals (Renshaw &

69 Trede, 2012; Witten & Huysseune, 2009). Compared to classic vertebrate models such as  
70 rodents (Brittijn et al., 2009) zebrafish research benefits from early and rapid bone  
71 development in the presence of optical transparency up to a late larval stage (Cubbage &  
72 Mabee, 1996). *In vivo* imaging of immune and skeletal tissue can be performed using a variety  
73 of transgenic tools labeling specific bone and immune cell types, enabling the visualization of  
74 cellular interactions in real time (Chen & Zon, 2009; Hammond & Moro, 2012).

75 Studies investigating the cellular reaction of zebrafish bone cells to injury have focused on the  
76 adult fin, in particular after amputation or cryoinjury (Ando et al., 2017; Chassot et al., 2016;  
77 Geurtzen et al., 2014; Knopf et al., 2011; Singh et al., 2012; Sousa et al., 2011), or on the  
78 zebrafish jaw (Ohgo et al., 2019; Paul et al., 2016; H. Zhang et al., 2015). During fin and scale  
79 regeneration, live imaging of injury-responsive osteoblasts identified their ability to migrate  
80 and dedifferentiate, but also revealed the importance of *de novo* osteoblast generation (Ando  
81 et al., 2017; Cox et al., 2018; Geurtzen et al., 2014). Larval zebrafish models have been  
82 employed to understand vertebrate bone development (Ahi et al., 2016; DeLaurier et al.,  
83 2019; Kimmel et al., 2010; Sharif et al., 2014; Tarasco et al., 2017) and to decipher  
84 pathomechanisms underlying congenital skeletal disease (Fiedler et al., 2018; Gistelinck et al.,  
85 2018; Tonelli et al., 2020). While *in vivo* imaging studies on immune cell recruitment after  
86 infection and injury of non-osseous tissues (axonal tissue, mesenchymal fin fold tissue) are  
87 widely used (Ellett et al., 2011; Tomoya Hasegawa et al., 2017; Isles et al., 2019; Li et al., 2012;  
88 Lieschke et al., 2001; Sanderson et al., 2015) sterile larval bone injury models are missing.

89 In this study, we present a novel laser-induced lesion paradigm in a developing skull bone in  
90 zebrafish, which provides a powerful tool to study the interaction between bone and immune  
91 cells *in vivo*. Using this model, we demonstrate the variable extent of immune cell recruitment  
92 in response to ablation of osteoblasts, illustrate the ablation-induced release of reactive  
93 oxygen species (ROS) and show that neutrophils, tissue-resident macrophages and  
94 *cathepsinK*<sup>+</sup> osteoclast-like cells are attracted to dying osteoblasts, which are replenished by  
95 proliferation and migration of *osterix*<sup>+</sup> osteoblasts. Macrophage recruitment is inhibited by  
96 the systemic application of antioxidants as well as glucocorticoid administration, which  
97 additionally changes macrophage phenotype. Ablation of macrophages by a nitroreductase-  
98 mediated approach leads to a reduction of osteoblasts at the lesion site. Our model can be  
99 used to elucidate the signals driving appropriate and disturbed macrophage and neutrophil

100 recruitment to injured bone tissue *in vivo*, which is relevant for a variety of inflammatory bone  
101 diseases and for bone cell turnover during tissue homeostasis.

102

## 103 **Results**

104 *A 10 % ablation of opercular osteoblasts is quickly reversed and leaves opercular growth*  
105 *unaffected*

106 UV laser mediated cell ablations, which lead to loss of fluorescent signal produced by  
107 transgenic fluorophore reporters (Morsch et al., 2017), are known to effectively kill target  
108 cells in zebrafish (Dehnisch Ellström et al., 2019; Mathias et al., 2006; Smutny et al., 2015). In  
109 order to create a confined lesion in bone and simulate osteoblast cell death, we performed  
110 osteoblast ablation in transgenic *osterix:nGFP* zebrafish larvae at 6 days post fertilization  
111 (dpf), in which osteoblasts of the forming gill cover (opercle) are labeled by GFP, by using  
112 specific UV laser settings at a spinning disk confocal microscope. We evaluated the cell  
113 damage performed by laser ablation by investigating the number of opercular osteoblasts  
114 with and without lesion at several time points. At 1 hour post lesion (hpl) we detected a  
115 prominent loss of GFP signal at the lesion site (**Fig. 1A**), which corresponded to a loss of  
116 approximately 10 % opercular osteoblasts (100 +/- 9,9 cells in uninjured vs. 87,4 +/- 10,2 cells  
117 in lesioned zebrafish, **Fig. 1B**). At 1 day post lesion (dpl), recovery of GFP fluorescence in the  
118 lesion site was observed, despite the fact that osteoblast numbers remained slightly (but not  
119 significantly) lower than in control fish (103,4 +/- 7,3 cells in uninjured vs. 93,5 +/- 10,1 cells  
120 in lesioned zebrafish). Complete recovery of osteoblast number was achieved at 2 dpl (110,9  
121 +/- 10,6 cells in uninjured vs. 106,1 +/- 7,9 cells in lesioned zebrafish, **Fig. 1B**), illustrating the  
122 quick recovery of osteoblast numbers in laser ablated opercles.

123 Next, we characterized the effect of laser-assisted osteoblast lesions on opercle structure and  
124 growth. To evaluate opercle volume before and after lesion, we stained zebrafish larvae by  
125 alizarin red live staining, which labels calcified structures (Javidan & Schilling, 2004), and  
126 rendered the surface with the help of IMARIS software. Ablation of osteoblasts led to a  
127 distinct structural change of the calcified matrix in the form of two closely spaced rings in  
128 places where the laser had hit (arrow and insets in **Fig. 1C**). These marks could be observed  
129 for several days post lesion, and disappeared by 9 dpl (**Fig. 1C**). As these marks were quite

130 prominent, and because bone forming osteoblasts were ablated, we wondered whether a  
131 change in opercle volume would result from lesion. Notably, quantification of opercular  
132 volume across different stages showed that there were no significant differences between  
133 lesioned and respective control zebrafish larvae (uninjured vs lesioned, all  $\times 10^3 \mu\text{m}^3$ , 1 dpl:  
134 47,7  $\pm$  11,0 vs. 47,0  $\pm$  5,6, 2 dpl: 52,08 $\pm$ 9,9 vs. 53,4  $\pm$  11,1, 3 dpl: 49,4  $\pm$  12,5 vs. 58,9  
135  $\pm$  4,1, 6dpl: 63,3  $\pm$  22,4 vs. 63,9  $\pm$  4,8, 9 dpl: 193,4  $\pm$  51,6 vs. 225,4  $\pm$  37,2, **Fig. 1D**).  
136 This indicates that osteoblast ablation does not grossly affect opercular growth rate, although  
137 a temporal and spatially restricted structural damage in mineralized matrix could be  
138 observed, and that osteoblast numbers recover very quickly after ablation of a significant  
139 portion of osteoblasts.

Fig.1

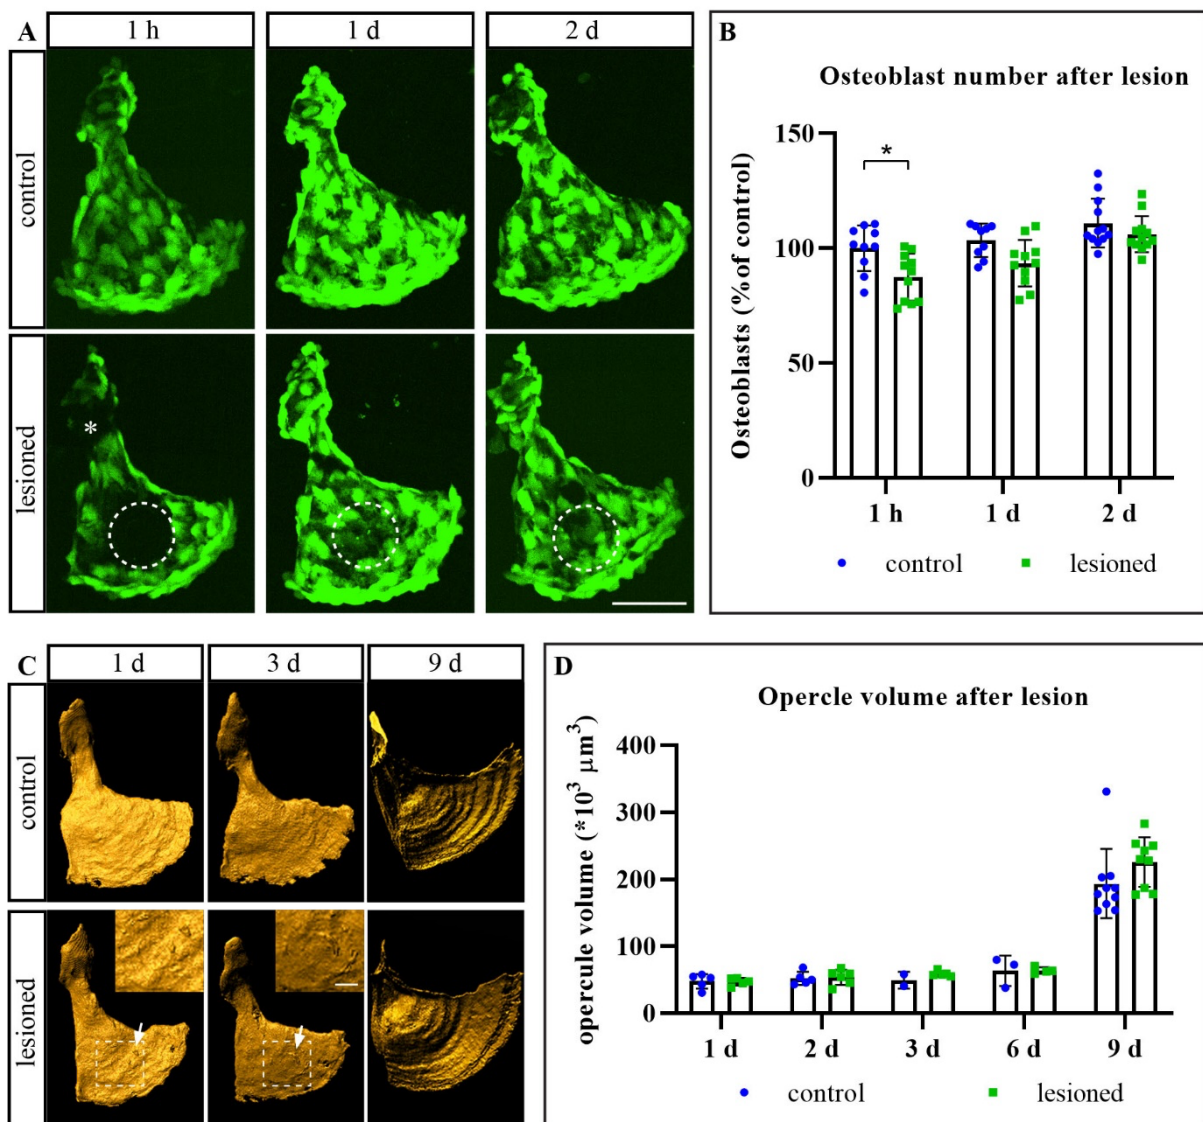

140

141 **Fig. 1: Osteoblast recovery and unaffected opercular growth after laser ablation.** **A:** Representative images of the opercle  
142 region in transgenic *osterix:nGFP* 6 dpf larval zebrafish. Loss of osteoblasts at 1 hpl and full recovery at 2 dpl can be observed.  
143 White dashed line = ablated area. Scale bar = 50  $\mu$ m. **B:** Quantification of osteoblast numbers from experiment shown in A.  
144 About 10 % of the osteoblasts are ablated. Mean + s.d. Students-t-test: \*  $p = 0.011$ .  $n = 9-12$ . **C:** Opercles of 6 dpf lesioned  
145 zebrafish stained with alizarin red. Boxed area with arrows and inset: Laser traces in the form of two spaced rings. Scale bar  
146 overview = 20  $\mu$ m. Scale bar insets = 10  $\mu$ m. **D:** Quantification of opercular volume from experiment shown in C. No significant  
147 differences can be observed. Mean + s.d. Sidaks' ANOVA.  $n = 3-10$ . h = hours, d = days.

148

149 *Osteoblast numbers recover by proliferation and migration of committed *osterix+* osteoblasts*

150 Because quick recovery of osteoblast numbers was observed after lesion, we wondered how  
151 this recovery was accomplished. The most plausible explanation to us seemed to be the  
152 possibility that remaining osteoblasts proliferated in order to restore the necessary pool of  
153 osteoblasts. To test this, we performed live imaging of transgenic *osterix:nGFP* x  
154 *histone:mCherry* zebrafish larvae, in which nuclei of osteoblasts can be identified by co-  
155 localization of GFP and mCherry (Knopf et al., 2011), and by using *osterix:nGFP* transgenic  
156 animals. Although osteoblast proliferation occurred (**Movie 1**), it was a rare event (observed  
157 in 1 out of 15 larvae). At the same time, we observed slow relocation of pre-existing  
158 osteoblasts, as indicated by an increased number of osteoblasts reaching into the lesion site  
159 at 12 hpl (**Fig. 2A**). To confirm migration of pre-existing osteoblasts into the ablation site, we  
160 performed CreERT2-loxP mediated lineage tracing of *osterix+* osteoblasts. *osterix:CreERT2-*  
161 *p2a-mCherry* x *hsp70:R2nlsG* double transgenic fish (Geurtzen et al., 2014; Hans et al., 2009;  
162 Knopf et al., 2011) were either treated with 4-hydroxytamoxifen (4-OHT) to induce CreERT2  
163 activity and excision of a loxP-flanked DsRed Stop cassette in osteoblasts, or the vehicle  
164 control one day before the lesion (**Fig. 2B**). Three days post osteoblast ablation the resulting  
165 nuclear GFP+ osteoblasts representing recombined cells and their progeny were visualized  
166 with the help of a heat shock (**Fig. 2B, C**) (Geurtzen et al., 2014; Hans et al., 2009; Knopf et al.,  
167 2011). In 4-OHT treated larvae, GFP+ osteoblasts accumulated at the lesion site (**Fig. 2C**, white  
168 arrow), while no GFP+ cells were detectable in the vehicle control. These results indicate that  
169 committed *osterix+* opercular osteoblasts move into the ablation site to replenish the lost  
170 osteoblasts, a process which is likely supported by proliferation of the very same cells.  
171 However, future assays will be needed to test the possibility of *de novo* osteoblast formation  
172 from alternative sources.

Fig.2

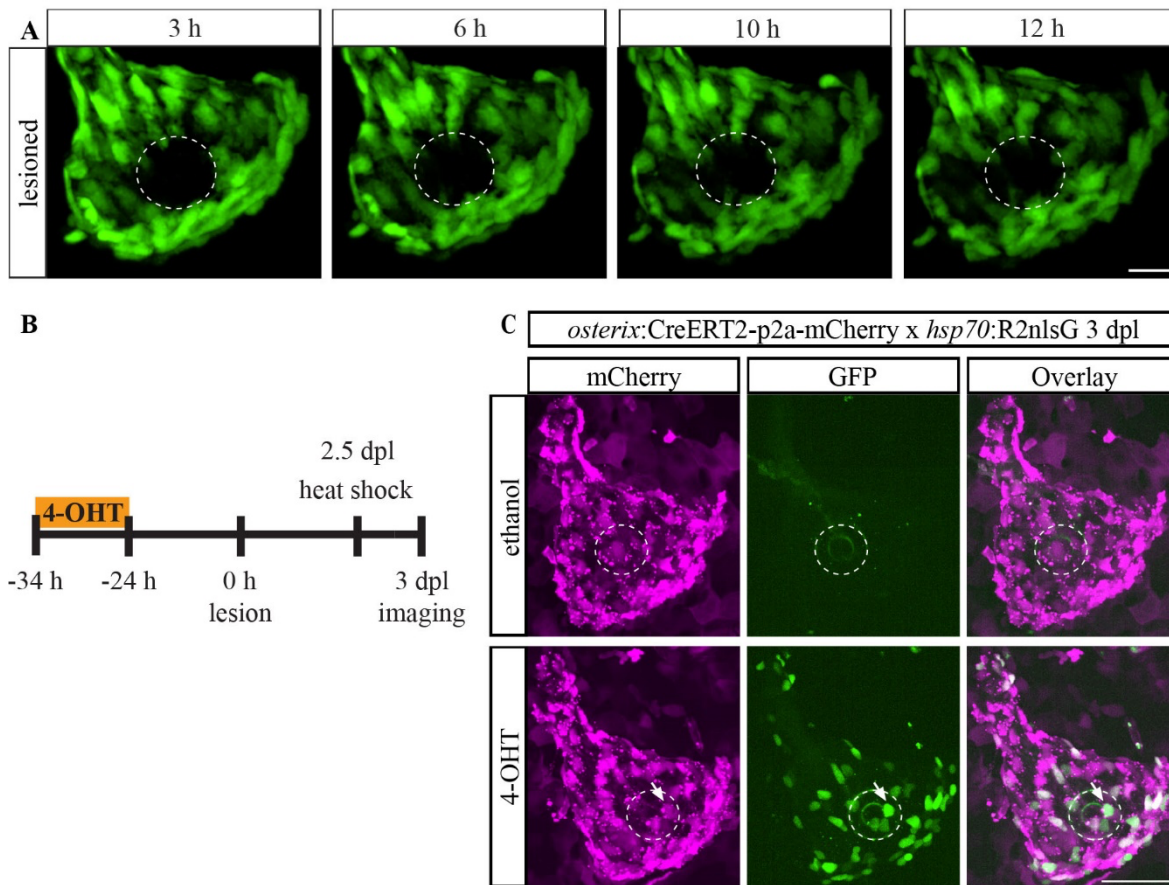

173

174 **Fig. 2: Pre-existing *osterix*<sup>+</sup> osteoblasts migrate into the lesion site after ablation.** **A:** Images of opercular osteoblasts in 6  
 175 dpf transgenic *osterix:nGFP* larval zebrafish. Cellular extensions reach into the lesion site (area within white dashed line)  
 176 within several hpl. Scale bar = 20  $\mu$ m. n = 3. **B:** Scheme on CreERT2-loxP mediated lineage tracing approach of osteoblasts.  
 177 Osteoblast ablation was performed at 6 dpf/12 h post 4-OHT/vehicle treatment. Two days later, a single heat shock was used  
 178 to visualize nuclear GFP expression. **C:** Representative images of 4-OHT and vehicle treated *osterix:CreERT2-p2a-mCherry x*  
 179 *hsp70:R2nlsG* larval zebrafish at 3 dpl (9 dpf). Pre-existing committed opercular osteoblasts are located at the lesion site  
 180 (white arrow and dashed line). Scale bar = 50  $\mu$ m. n = 5-7.

181

### 182 *Osteoblast cell death leads to the release of immune cell attractants*

183 Tissue damage and cell death lead to the release of a variety of chemokines and other  
 184 cytokines, which have the potential to attract immune cells to the site of wounding (Duffield,  
 185 2003; Keightley et al., 2014). Furthermore, both processes enhance the expression of  
 186 extracellular matrix (ECM) modifiers such as Matrix metalloproteinase 9 (Mmp9), a  
 187 collagenase associated with inflammation which is found in wounded zebrafish (LeBert et al.,  
 188 2015). We made use of transgenic *mmp9:EGFP* zebrafish (Ando et al., 2017) to test whether  
 189 Mmp9 expression is induced in zebrafish bone tissue upon osteoblast ablation. While



190 occasional GFP fluorescence was observed in the lesioned area at 1 dpl, we detected robust  
191 induction of GFP at the lesion site at 2 dpl (uninjured vs. lesioned, 1 hpl: 109,6 +/- 1,5 units  
192 vs. 108,6 +/- 0,3 units, 1 dpl: 112,2 +/- 8,3 units vs. 126,1 +/- 18,9 units, 2 dpl: 109,9 +/- 0,2  
193 units vs. 124,3 +/- 7,0 units, **Fig. 3A, B**). We set out to identify earlier signs of inflammatory  
194 cues after osteoblast ablation and turned to reactive oxygen species (ROS), which are known  
195 to be produced soon after acute wounding of other tissues such as the larval fin fold, where  
196 they are responsible for leukocyte attraction to the site of injury (Niethammer et al., 2009),  
197 or the tail (Romero et al., 2018). In order to test whether ROS were generated after laser-  
198 assisted osteoblast ablation, we pre-soaked *osterix:nGFP* larval zebrafish in CellROX orange  
199 dye, which starts to fluoresce upon ROS presence, performed lesions and concomitant *in vivo*  
200 imaging. Almost instantaneous activation of ROS-caused fluorescence was detected within a  
201 minute after ablation, and lasted throughout the imaging period of approximately 20 minutes.  
202 In contrast, control larvae which had not been lesioned but equally soaked in the CellROX  
203 orange dye, did not show any signs of fluorescence (**Fig. 3C, Movies 2 and 3**). These results  
204 indicate that sterile, laser-assisted ablation of a low number of bone forming cells triggers a  
205 similar response to injury as seen in other, more severe injury paradigms such as tissue  
206 resection. They also hint at a potential ability of the lesion paradigm to trigger recruitment of  
207 immune cells and osteoclasts (Callaway & Jiang, 2015), which, consequently, would allow the  
208 *in vivo* observation of leukocyte interactions with osteoblasts in bone tissue.

Fig.3

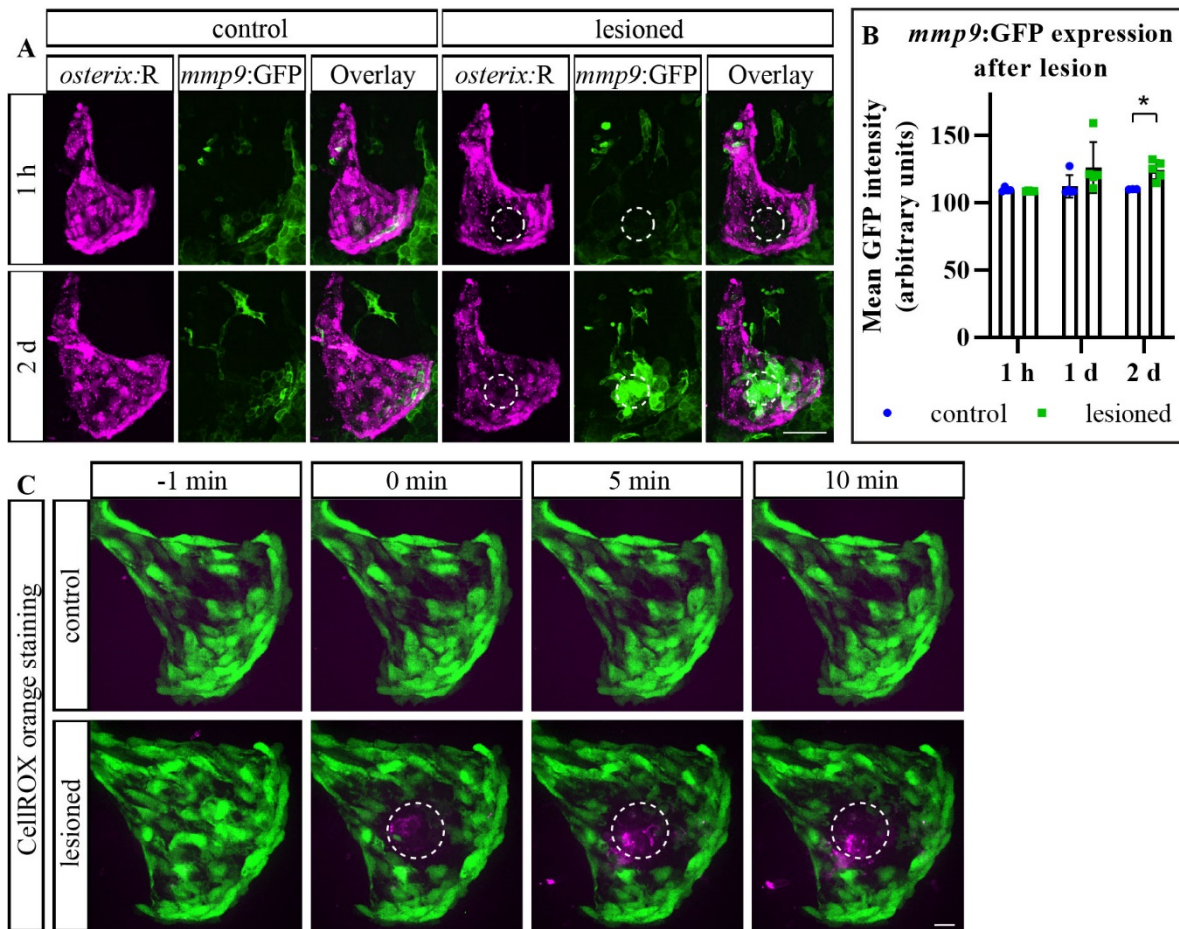

209

210 **Fig. 3: Laser-assisted osteoblast ablation triggers Mmp9 production and ROS release.** **A:** Transgenic *osterix:RFP* x *mmp9:GFP*  
 211 lesioned zebrafish showing robust *mmp9* activity at 2 dpl. White dashed line = lesioned area. Scale bar = 50  $\mu$ m. **B:**  
 212 Quantification of experiment shown in A. At 2 dpl GFP is significantly increased. Mean + s.d. Welch's T-test: \* $p$  = 0.010.  $n$  =  
 213 3-5. **C:** CellRox orange staining of lesioned and unlesioned transgenic *osterix:nGFP* zebrafish larvae. ROS release is visible  
 214 immediately after the laser lesion and increases over time in the ablation area (white dashed line). Scale bar = 10  $\mu$ m.  $n$  = 6-  
 215 7.

216 *Neutrophils, inflammatory macrophages and osteoclast-like cells become recruited to the*  
 217 *lesion site*

218 Cell death and the release of corresponding signals serve as triggers for recruitment of  
 219 immune cells (Duffield, 2003; Keightley et al., 2014). Increased levels of *mmp9:GFP* expression  
 220 and ROS after osteoblast ablation prompted us to test whether neutrophil numbers change  
 221 upon lesion. Live imaging of double transgenic *osterix:RFP* x *mpo:GFP* zebrafish larvae  
 222 labeling osteoblasts and neutrophils at the same time revealed fast recruitment of  
 223 neutrophils into the lesion area within minutes (**Fig. 4A**, **Movie 4**).

224 Similar to neutrophils, macrophages are attracted to the site of injury by cytokines and ROS  
225 (Mosser & Edwards, 2008). Moreover, early arriving neutrophils recruit macrophages to the  
226 injured or infected area after being the initial responders to the insult (Kolaczowska & Kubes,  
227 2013). We quantified the number of macrophages labeled by mCherry in double transgenic  
228 *osterix:nGFP x mpeg1:mCherry* zebrafish at different time points post lesion. While absolute  
229 macrophage numbers in the field of view did not change at 1 hpl, their number significantly  
230 increased until 1 dpl (uninjured vs. lesion, 1 hpl: 24,6 +/- 4,8 cells vs. 26,5 +/- 5,1 cells, 1 dpl:  
231 25,3 +/- 5,2 cells vs. 37,3 +/- 8,3 cells, **Fig. 4B**), which suggests recruitment of macrophages to  
232 the lesion site after neutrophil arrival. Live-imaging using the above double transgenic  
233 zebrafish confirmed fast recruitment of macrophages that had resided in the field of view into  
234 the osteoblast-ablated area, as well of slightly delayed recruitment of macrophages from  
235 outside the field of view starting around 20 min (**Fig. 4C, Movie 5**). More than 50 % of  
236 macrophages passing the field of view during the imaging time were attracted into the lesion  
237 site during the first and second hour post lesion (1 hpl: 50,8 +/- 9,0 %, 2 hpl: 68,0 +/- 7,4 %, **Fig. 4D**).  
238 Live-imaging of *osterix:nGFP x mpeg1:mCherry* zebrafish combined with a transgenic  
239 marker for endothelial tissue, *kdrl:CFP* (Hess & Boehm, 2012), revealed that macrophages  
240 attracted to the lesion site arrive from within the tissues close to the lesion site and not from  
241 the blood stream, confirming their tissue-residency (**Fig. 4E, Movie 6**).  
242

Fig.4

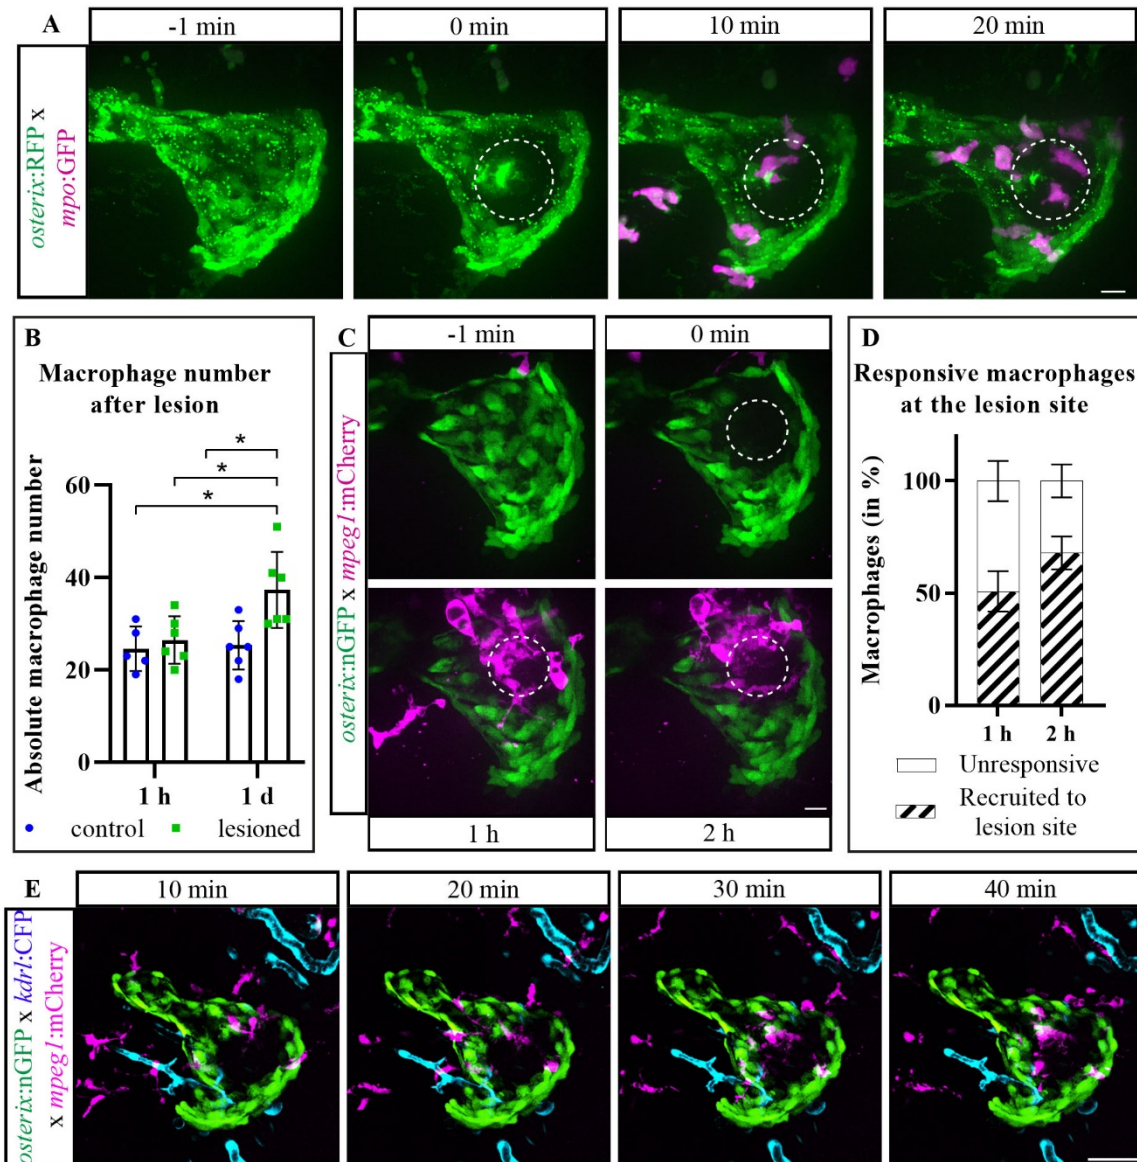

243

244 **Fig. 4: Neutrophil and macrophage recruitment to the site of osteoblast ablation.** **A:** Time series of the opercle region in  
 245 transgenic *osterix:RFP x mpo:GFP* zebrafish (RFP depicted in green). *mpo:GFP*<sup>+</sup> neutrophils, depicted in magenta, migrate  
 246 into the ablation site (white dashed line) within several minutes post-ablation. Scale bar = 10  $\mu$ m. n = 7. **B:** Quantification of  
 247 macrophage number in the opercle area. The number increases significantly after 1 day in lesioned opercles. Mean + s.d.  
 248 Tukey's ANOVA: \*p = 0.014 (1 d control vs. 1 d lesioned). n = 5-6. **C:** Time series of the opercle region of transgenic  
 249 *osterix:nGFP x mpeg1:mCherry* zebrafish in which macrophages, depicted in magenta, migrate into the ablation site (white  
 250 dashed line). Scale bar = 10  $\mu$ m. **D:** Quantification of responsive macrophages migrating into the ablated area in the  
 251 experiment shown in C. Mean + s.e.m. Sidak's ANOVA. n = 5. **E:** Time series of the opercle region of transgenic *osterix:nGFP*  
 252 *x kdrl:CFP x mpeg1:mCherry* zebrafish showing that macrophages, depicted in magenta, are recruited from the surrounding  
 253 tissue and not from blood vessels (ablation site indicated by white dashed line). Scale bar = 50  $\mu$ m. n = 3.

254 Different macrophage subtypes and polarization stages can be observed in response to injury  
 255 and inflammation (Stout et al., 2005). Early inflammatory responses are often associated with

256 the inflammatory type of macrophages (Duffield, 2003), also in zebrafish (Nguyen-Chi et al.,  
257 2015). Using triple transgenic *osterix:nGFP x mpeg1:mCherry x irg1:EGFP* zebrafish larvae in  
258 which activated macrophages (Sanderson et al., 2015) are labeled alongside osteoblasts, an  
259 increase in activated macrophages (mCherry/EGFP double+ migratory cells) was detected at  
260 1 dpl (100,0 +/- 53,8 % in uninjured vs. 169,6 +/- 69,6 % in lesioned, white arrows in **Fig. 5A,**  
261 **B**). Similarly, the use of *tnf- $\alpha$ :EGFP x mpeg1:mCherry* transgenic zebrafish (Marjoram et al.,  
262 2015) demonstrated increased numbers of inflammatory macrophages at 1 and 2 dpl  
263 (uninjured vs lesioned, 1 hpl: 6,0 +/- 2,9 % vs. 5,6 +/- 1,7 %, 1 dpl: 9,4 +/- 5,5 % vs. 18,0 +/- 5,1  
264 %, 2 dpl: 14,8 +/- 6,3 % vs. 24,2 +/- 9,4 %, white arrows in **Fig. 5C, D**). However, the majority  
265 of recruited macrophages at 1 and 2 dpl did not show the *tnf- $\alpha$* + inflammatory phenotype,  
266 which was only detected in about 20 % of all macrophages (1 dpl: 18,0 +/- 5,1 %, 2 dpl: 24,2  
267 +/- 9,4 %, **Fig. 5D**).

268 Next, we combined the macrophage reporter with an osteoclast reporter line established in  
269 our laboratory, in which *cathepsinK*+ cells are labeled by nuclear mCherry (*ctsK:nlsmCherry*,  
270 **Fig. S1**). This approach enabled simultaneous observation of macrophages and osteoclast-like  
271 cells after lesion. Osteoclasts are known derivatives of monocyte/macrophage lineage cells,  
272 both in mammals (Quinn et al., 1998) and medaka (Phan, Liu, et al., 2020), another teleost  
273 fish species. Using triple transgenic *osterix:nGFP x mpeg1:YFP x ctsK:nlsmCherry* zebrafish we  
274 observed YFP/nlsmCherry double positive migratory cells several hours post lesion (white  
275 arrows in **Fig. 5E**). These cells were positive for *mpeg1* and *ctsK*, indicating that macrophages  
276 convert to *ctsK*+ osteoclasts after osteoblast ablation to some extent.

277 These results demonstrate that ablation of approximately ten cells in a confined region is  
278 sufficient to recruit leukocytes, and that the rapid recruitment of neutrophils is followed by  
279 attraction of inflammatory macrophages. This indicates the presence of a classic early wound  
280 response in the sterile laser-assisted bone lesion paradigm. Potential conversion of  
281 macrophages into osteoclasts suggests macrophages as a source for osteoclasts in larval  
282 zebrafish.

Fig.5

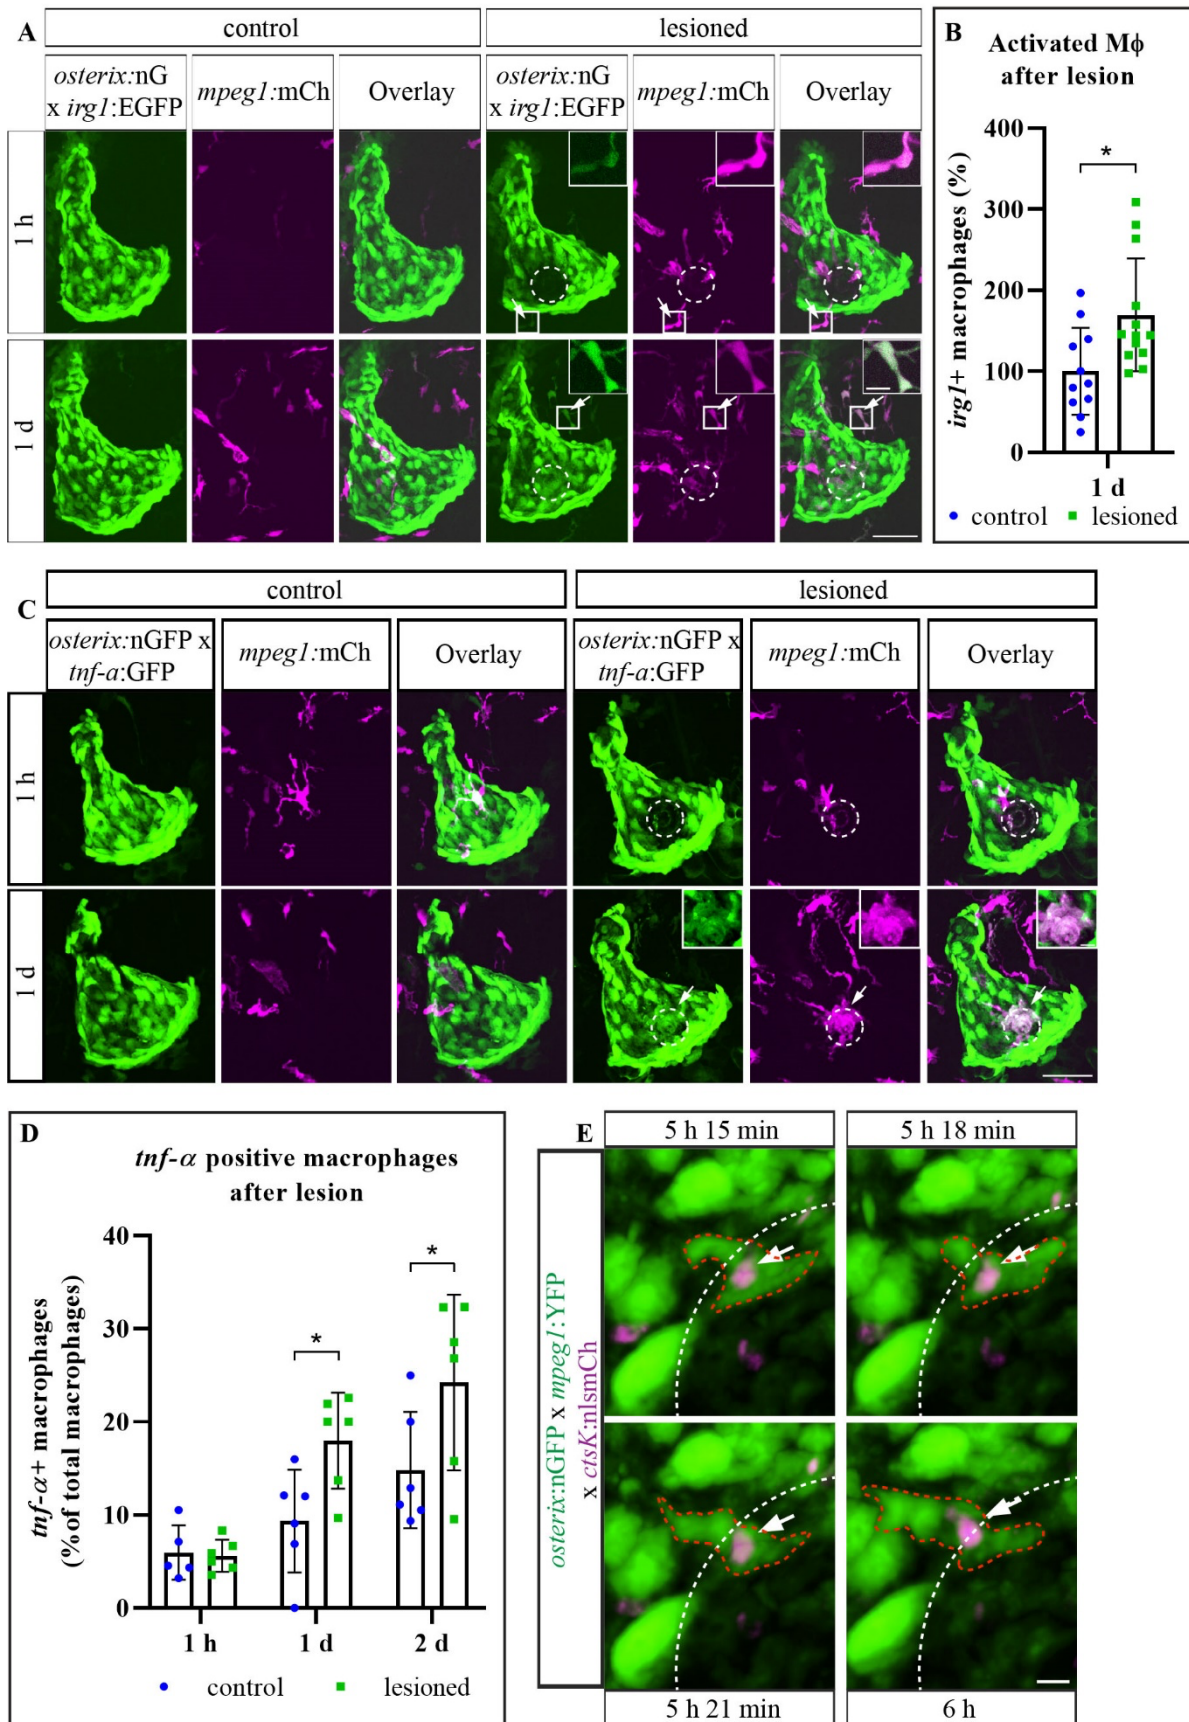

283

284 **Fig. 5: Inflammatory macrophage and osteoclast presence after osteoblast ablation.** **A:** Representative images of transgenic  
285 *osterix:nGFP x irg:EGFP x mpeg1:mCherry* uninjured and ablated zebrafish opercular regions. Activated macrophages can be  
286 detected in the lesioned opercle at 1 hpl and 1 dpl by co-expression of *irg1:EGFP* and *mpeg1:mCherry* (arrows and insets).  
287 Scale bar = 20  $\mu$ m. **B:** Quantification of activated macrophage numbers after osteoblast ablation in experiment shown in A.  
288 Increased numbers of activated macrophages can be detected at 1 dpl. Mean + s.d. Welch's t-test: \*p = 0.012. M $\Phi$  =  
289 macrophage. n = 11-13. **C:** Representative images of transgenic *osterix:nGFP x tnf- $\alpha$ :GFP x mpeg1:mCherry* zebrafish  
290 opercular regions. Inflammatory macrophages can be detected in the lesioned area (white dashed line) at 1 dpl by co-  
291 expression of *tnf- $\alpha$ :GFP* and *mpeg1:mCherry* (arrows and insets). Scale bar = 20  $\mu$ m. **D:** Quantification of inflammatory  
292 macrophages after osteoblast ablation in experiment shown in C. Increased numbers of inflammatory macrophages can be  
293 detected at 1 and 2 dpl. Mean + s.d. Sidak's ANOVA: 1 dpl \*p = 0.045, 2 dpl \*p = 0.026. n = 5-6. **E:** Opercle region of transgenic  
294 *osterix:nGFP x mpeg1:YFP x ctsK:nlsMCherry* larvae at 5 to 6 hpl showing an *mpeg1+*, *ctsK+* cell (white arrow and red dashed  
295 outline). White dashed line = border of the lesioned area. Scale bar = 5  $\mu$ m. n = 4.

296

### 297 *Antioxidant treatment suppresses macrophage attraction to the lesion site*

298 Macrophages are attracted to their sites of action by oxidized proteins, lipids and cellular  
299 debris of apoptotic cells which are either exposed to or produce high levels of ROS (Tan et al.,  
300 2016). The presence of ROS has also been shown to be imperative for wound repair in fin fold  
301 and tail resected zebrafish larvae (LeBert et al., 2015; Romero et al., 2018). In order to assess  
302 the importance of ROS for immune cell recruitment and osteoblast recovery after laser-  
303 assisted cell ablation in bone, we treated larval zebrafish with DPI (diphenyleneiodonium  
304 chloride), a NADPH oxidase inhibitor which efficiently blocks ROS directly after fin fold  
305 amputation (**Fig. S2**) (Robertson et al., 2016), and assessed the recruitment of macrophages  
306 to the osteoblast ablation site. We observed limited recruitment of macrophages after DPI  
307 treatment (**Fig. 6, Movie 7**), which indicates that production or release of ROS is essential for  
308 recruitment of macrophages to bone after osteoblast cell death.

Fig.6

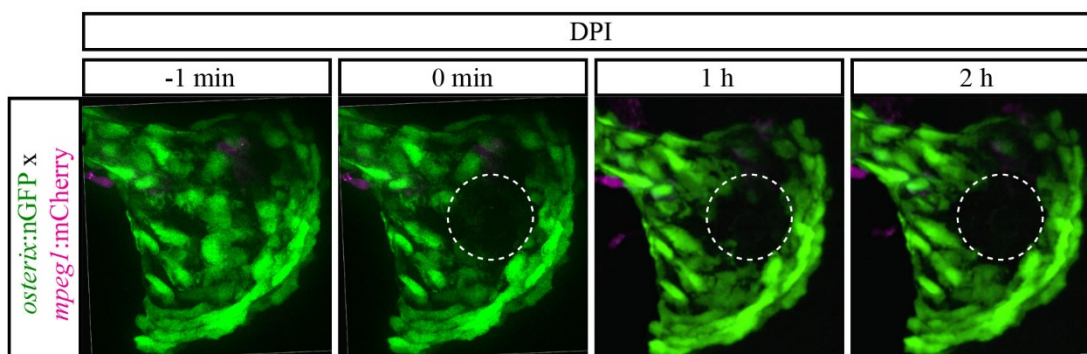

309

310 **Fig. 6: Antioxidant treatment impairs macrophage recruitment to ablated osteoblasts.** Time series of osteoblast-ablated,  
311 transgenic *osterix:nGFP* zebrafish, in which macrophage recruitment into the lesioned area (white dashed line) is blocked by  
312 a 5-hour pre-treatment with the antioxidant DPI. Scale bar = 10  $\mu$ m. n = 6.

313

314 *Immune-suppression by prednisolone alters macrophage recruitment to the lesion site*

315 Macrophage activation and subtype specification need to be tightly controlled, otherwise an  
316 overexerted immune response might harm the tissue (Duffield, 2003). Persistent  
317 inflammation is also the cause for a variety of diseases that affect the skeletal system, such  
318 as rheumatoid arthritis which is routinely treated with glucocorticoids (den Uyl et al., 2011).  
319 These steroids inhibit the inflammatory response and particularly suppress macrophage  
320 recruitment in a variety of mammalian models (Cain & Cidlowski, 2017; Mosser & Edwards,  
321 2008; Sharif et al., 2015). Making use of a previously established regime of larval zebrafish  
322 prednisolone treatment (Geurtzen et al., 2017), we tested whether mis-regulation of  
323 glucocorticoid receptor mediated signaling impacts (inflammatory) macrophage recruitment  
324 to the lesion site. After an 8-hour pre-treatment with prednisolone, which did not significantly  
325 alter the number of macrophages in the entire head of 6 dpf larvae (DMSO: 119,4 +/- 10,7  
326 cells vs. pred: 110,4 +/- 16,92 **Fig. 7A**), and subsequent lesion, accumulation of macrophages  
327 at the lesion site was strongly reduced (**Fig. 7B, Movies 8 and 9**). A mere 10 % of the  
328 macrophages present in the opercle area were recruited into the lesion site during the first 2  
329 hpl when prednisolone was administered, while more than 50 % of nearby macrophages were  
330 recruited to the lesion site in vehicle treated zebrafish (DMSO: 58,5 +/- 4,8 % vs. pred: 12,8  
331 +/- 7,2 %, **Fig. 7C**).

332 We went on to test the impact of prednisolone on the appearance of *tnf- $\alpha$ :EGFP+*  
333 inflammatory macrophages and determined the respective percentage of this inflammatory  
334 macrophage subtype in the opercle after treatment. Pre-treatment with the steroid  
335 significantly reduced inflammatory macrophage numbers as early as 1 hpl (DMSO vs. pred, 1  
336 hpl: 19,1 +/- 8,8 % vs. 5,3 +/- 4,5 %, 1 dpl: 29,8 +/- 9,1 % vs. 13,7 +/- 12,4 %, **Fig. 7D, E**). These  
337 results show that glucocorticoids severely impair macrophage recruitment to microlesions in  
338 bone tissue, simultaneously suppressing their inflammatory activated phenotype.



Fig.7

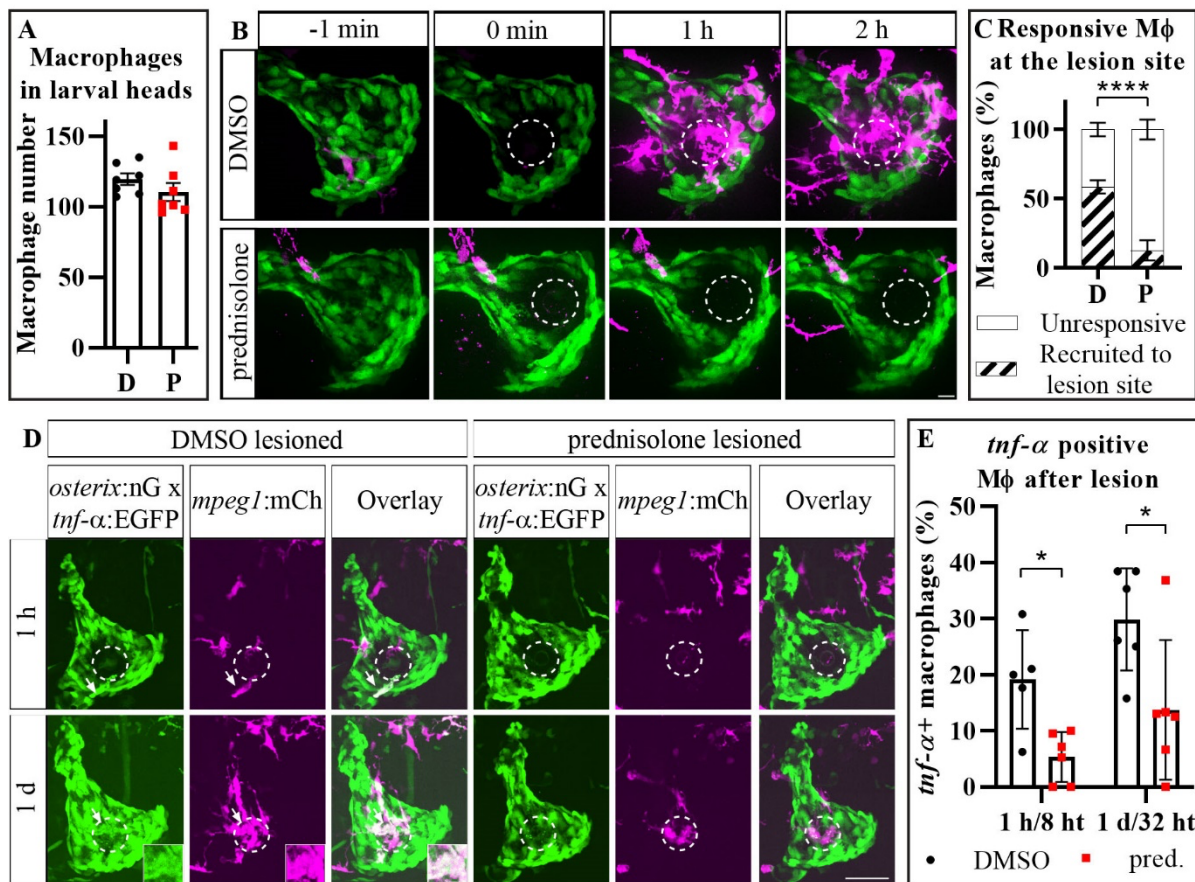

339

340 **Fig. 7: Prednisolone treatment alters the recruitment of macrophages to the ablation site.** A: The number of macrophages  
 341 in the head of 6 dpf larval zebrafish after 8 ht (hours of treatment) with prednisolone is not altered compared to the control.  
 342 Mean + s.e.m. Welch's t-test. n = 7. B: Time series of the opercular areas of transgenic *osterix:nGFP x mpeg1:mCherry*  
 343 prednisolone and vehicle treated larvae. Prednisolone exposure strongly reduces the number of macrophages recruited into  
 344 the lesioned area (white dashed line). Scale bar = 10 μm. C: Quantification of experiment shown in B. The number of  
 345 responsive macrophages migrating into the lesioned area is significantly impaired by prednisolone treatment at 2 hpl. Mean  
 346 + s.e.m. Sidak's ANOVA: \*\*\*\*p < 0.0001. n = 6-7. D: Representative images of transgenic *osterix:nGFP x tnfr-α:EGFP x*  
 347 *mpeg1:mCherry* osteoblast-ablated zebrafish opercular regions after prednisolone treatment. While inflammatory  
 348 macrophages can be detected in the lesioned area (white dashed line) at 1 dpl by co-expression of *tnfr-α:EGFP* and  
 349 *mpeg1:mCherry* in the DMSO control fish (arrows and insets), their presence is impaired by prednisolone treatment. Scale  
 350 bar = 20 μm. E: Quantification of experiment shown in D. Decreased numbers of inflammatory macrophages are detected in  
 351 the opercle at 1 and 2 dpl in the prednisolone treated group. Mean + s.d. Sidak's ANOVA: 1 hpl \*p = 0.044, 1 dpl \*p = 0.013.  
 352 n = 5-6. Mφ = macrophage, D = DMSO, P = prednisolone, pred. = prednisolone.

353

354 *Single-cell lesions allow the characterization of macrophage migratory features in response to*  
 355 *osteoblast cell death and anti-inflammatory treatment*

356 We asked ourselves whether smaller lesions causing cell death in fewer than 10 osteoblasts  
357 would reliably attract leukocytes to the site of lesion, a scenario potentially relevant to  
358 homeostatic tissue conditions, in which loading and cell senescence may lead to isolated cell  
359 death (Kennedy et al., 2012). In order to investigate macrophage recruitment and migration  
360 in more detail and to further study the effects of excess glucocorticoids on these features, we  
361 performed ablation of two to three osteoblasts in the center of the opercle (**Fig. 8A**, lesion  
362 outlined with white dashed line), and combined this with steroid drug administration.  
363 Recruitment of macrophages to the confined lesion site was apparent in both vehicle-treated  
364 and prednisolone-treated zebrafish (**Fig. 8B and Movies 10 and 11**); however, the relative  
365 contribution of nearby macrophages was strongly reduced compared to bigger lesions (big  
366 lesion 58,5 +/- 4,8 % vs. 18,1 +/- 8,7 % small lesion, both vehicle-treated). This indicates an  
367 injury-triggered dose-response-like mechanisms in leukocyte recruitment. In prednisolone-  
368 exposed larvae, a mild decrease of macrophage recruitment was evident (DMSO: 18,1 +/- 8,7  
369 % vs. pred: 2,9 +/- 2,9 % at 4 hpl, **Fig. 8C**), similar to what was observed after ablation of a  
370 higher number of osteoblasts. This strongly suggests that death of individual bone cells is  
371 detected by locally patrolling macrophages in otherwise unaffected tissue, and that anti-  
372 inflammatory treatment affects immune cell-osteoblast communication during tissue  
373 homeostasis.

374 The lower number of recruited macrophages in microlesions enabled us to track individual  
375 macrophages by ARIVIS 4D software and to analyze migration characteristics in undisturbed,  
376 vehicle treated zebrafish larvae versus individuals after glucocorticoid treatment (**Fig. 8D**).  
377 Migratory track analysis revealed an average macrophage speed of 25,1 +/- 4,7 nm/s in  
378 vehicle treated controls, which was mildly but not significantly reduced to 16,8 +/- 2,5 nm/s  
379 by prednisolone treatment (**Fig. 8E**). Similarly, prednisolone treatment exerted subtle (albeit  
380 insignificant) effects on macrophage straightness (DMSO: 0,13 +/- 0,02 units vs. pred: 0,09 +/-  
381 0,01 units, **Fig. 8F**), a parameter describing directional migration of cells. Importantly,  
382 glucocorticoid administered zebrafish showed significantly reduced macrophage maximum  
383 speed (**Fig. 8G**), which was decreased to about half (216,4 +/- 32,29 nm/s in DMSO vs. 115,1  
384 +/- 16,16 nm/s in prednisolone treated individuals). This illustrates the agility of macrophages  
385 on their way to the microlesion site, and demonstrates the stationary phenotype of  
386 macrophages upon excess glucocorticoid levels.

387 The lower number of macrophages attracted to the lesion site also allowed a detailed  
388 investigation of macrophage morphology and respective changes upon lesion in vehicle  
389 treated versus glucocorticoid treated zebrafish. Macrophages displayed an amoeboid  
390 morphology (**Fig. 8H**, macrophage outlined in blue) or changed into an amoeboid phenotype  
391 while migrating towards the lesion site in vehicle treated individuals (**Fig. 8H**, macrophage  
392 outlined in yellow). In contrast, macrophages had a ramified and elongated phenotype with  
393 several protrusions in prednisolone-exposed individuals (**Fig. 8H**, macrophage outlined in  
394 red). These results show that ablation of individual cells triggers a considerable immune  
395 response in zebrafish bone tissue, and that short-term glucocorticoid treatment affects  
396 macrophage morphology and migration.

Fig.8

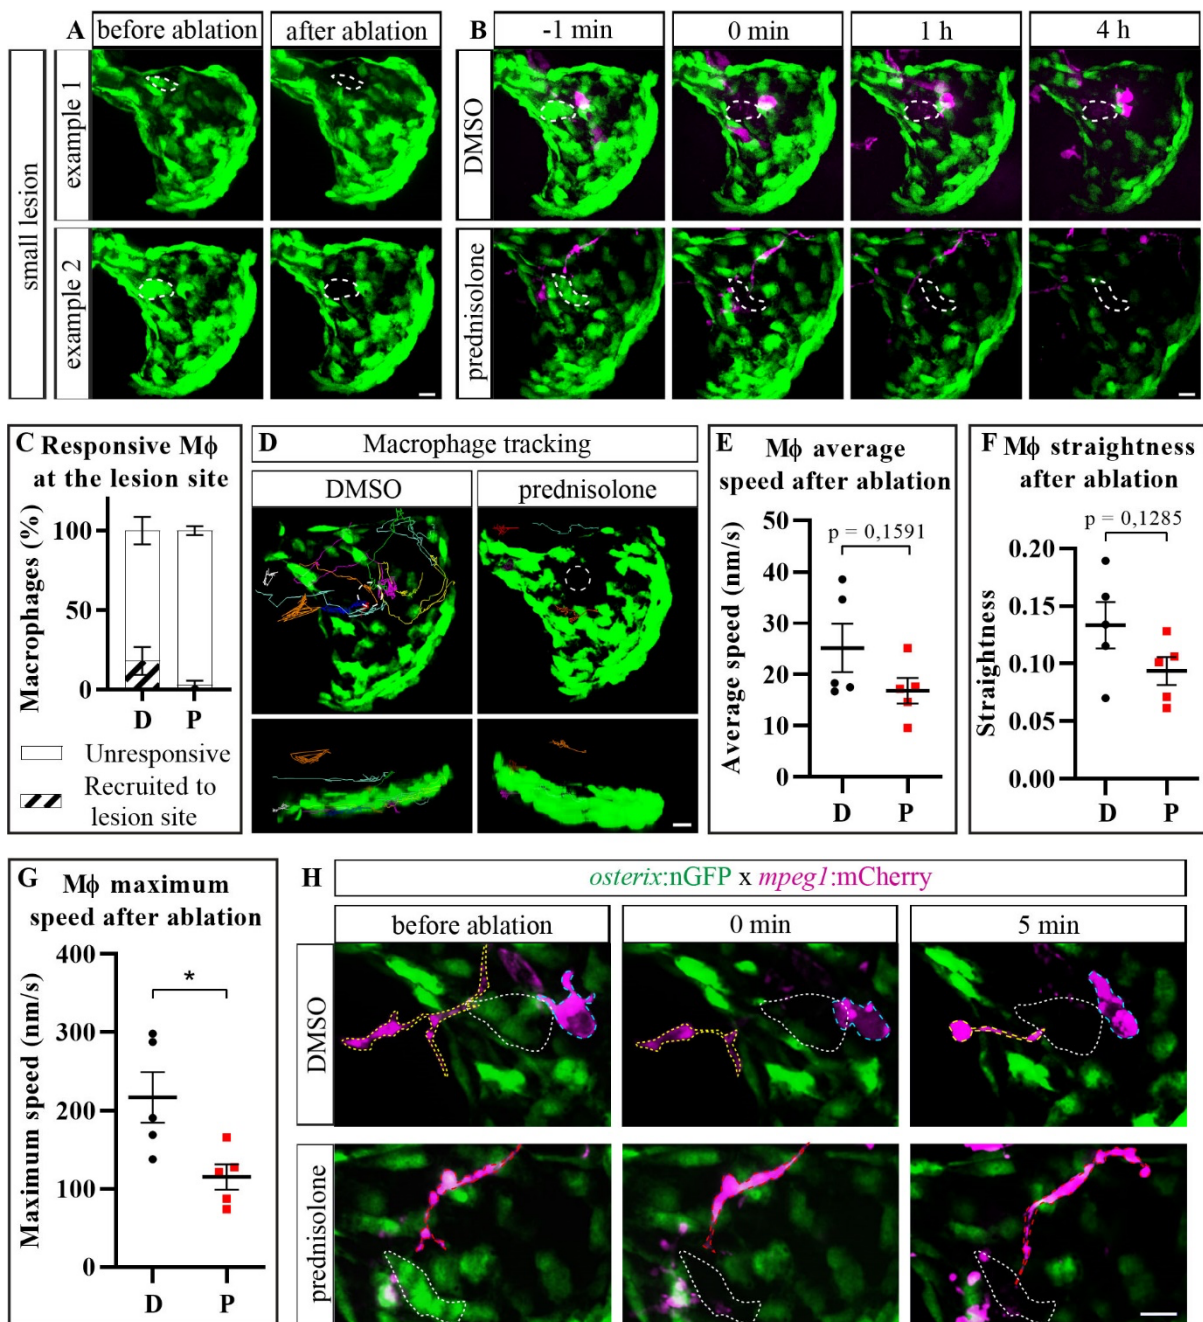

397

398 **Fig. 8: Migratory features of macrophages in response to individual osteoblast ablation and prednisolone-treatment. A:**  
 399 Examples showing specific ablation of only a few isolated osteoblast cells in vehicle treated zebrafish (precise region of  
 400 osteoblast ablation = white dashed line. Scale bar = 10  $\mu$ m. **B:** Time series of the opercular region in transgenic *osterix:nGFP*  
 401 *x mpeg1:mCherry* vehicle treated (same as example 2 in A) vs. prednisolone treated larvae with a small lesion. Prednisolone  
 402 exposure reduces the number of macrophages (magenta) recruited into the lesioned area (white dashed line). Scale bar = 10  
 403  $\mu$ m. **C:** Quantification of the experiment shown in B. The response of macrophages by migration towards and into the lesion  
 404 area is slightly (though not significantly) impaired by prednisolone-treatment at 4 hpl. Mean + s.e.m. Sidak's ANOVA. n = 5.  
 405 **D:** Representative images of individual macrophage tracking analysis in DMSO and prednisolone treated *osterix:nGFP x*  
 406 *mpeg1:mCherry* larvae after small lesion. Arivis Vision 4D obtained tracks were overlaid with the first image after osteoblast  
 407 ablation (upper panels = x-y view, lower panels = orthogonal view. Prednisolone treatment resulted in a lower number of

408 tracks and lacking migration into the lesion site. Scale bar = 10  $\mu$ m. **E**: Quantification of the average macrophage speed using  
409 the tracking shown in D. Macrophages are slightly albeit not significantly slower after prednisolone treatment. Mean + s.e.m.  
410 Welch's t-test. n = 5. **F**: Quantification of macrophage straightness using the tracking shown in D. Straightness is slightly albeit  
411 not significantly reduced in prednisolone treated larvae. Mean + s.e.m. Welch's t-test. n = 5. **G**: Quantification of the  
412 maximum macrophage speed using the tracking shown in D. The maximum speed of prednisolone exposed macrophages is  
413 significantly lower. Mean + s.e.m. Welch's t-test: \*p = 0.023. n = 5. **H**: Representative images of macrophages in the opercle  
414 region of *osterix:nGFP x mpeg1:mCherry* transgenic larvae treated with prednisolone or vehicle for 8 h. Time points shown:  
415 before, right after and 5 minutes post osteoblast ablation. White dashed line = region of ablated osteoblasts, blue dashed  
416 line = amoeboid macrophage, yellow dashed line = macrophage changing from ramified to amoeboid phenotype, red dashed  
417 line = ramified macrophage. Scale bar = 10  $\mu$ m. M $\Phi$  = macrophage, D = DMSO, P = prednisolone.

418 As prednisolone treatment impaired macrophage recruitment to the ablation site and  
419 macrophages were recently suggested to promote osteoblast differentiation and bone  
420 mineralization in mammalian bone repair (Batoon et al., 2017), we investigated the effect of  
421 prednisolone administration on recovery of osteoblast numbers after lesion. We detected a  
422 significant reduction of osteoblasts in the opercle area after lesion of prednisolone treated  
423 zebrafish (DMSO 104,7 +/- 8,43 vs. pred. 92,3 +/- 6,62 cells, **Fig. 9A**), which indicated that  
424 macrophages may have a pro-osteogenic function in the repair of microlesions. To test this,  
425 we specifically ablated macrophages by a genetic nitroreductase (NTR)-mediated killing  
426 approach (Curado et al., 2008) in triple transgenic *osterix:CreERT2-p2a-mCherry x*  
427 *hsp70:R2nlsG x mpeg1:YFP-NTR* zebrafish (Petrie et al., 2014), and quantified the number of  
428 lineage-traced osteoblasts in the presence or absence of NTR (schematic **Fig. 9B**).  
429 Macrophage ablated samples showed a reduced number of lineage-traced, GFP+ osteoblasts  
430 at the lesion site (NTR- 2,73 +/- 0,90 vs. NTR+ 1,58 +/- 0,90 cells, **Fig. 9C, D**). In a separate  
431 experiment testing the impact of macrophage presence on general bone growth, osteoblast  
432 numbers were significantly reduced after a longer ablation period (NTR- vs. NTR+: 78,15 +/-  
433 12,14 vs. 69,30 +/- 6,24 cells, **Fig. S3**).

434 In conclusion, manipulation of macrophage phenotype by pharmacologic glucocorticoid-  
435 treatment and their ablation by nitroreductase affect osteoblast recovery after microscopic  
436 bone lesion.

437

Fig.9

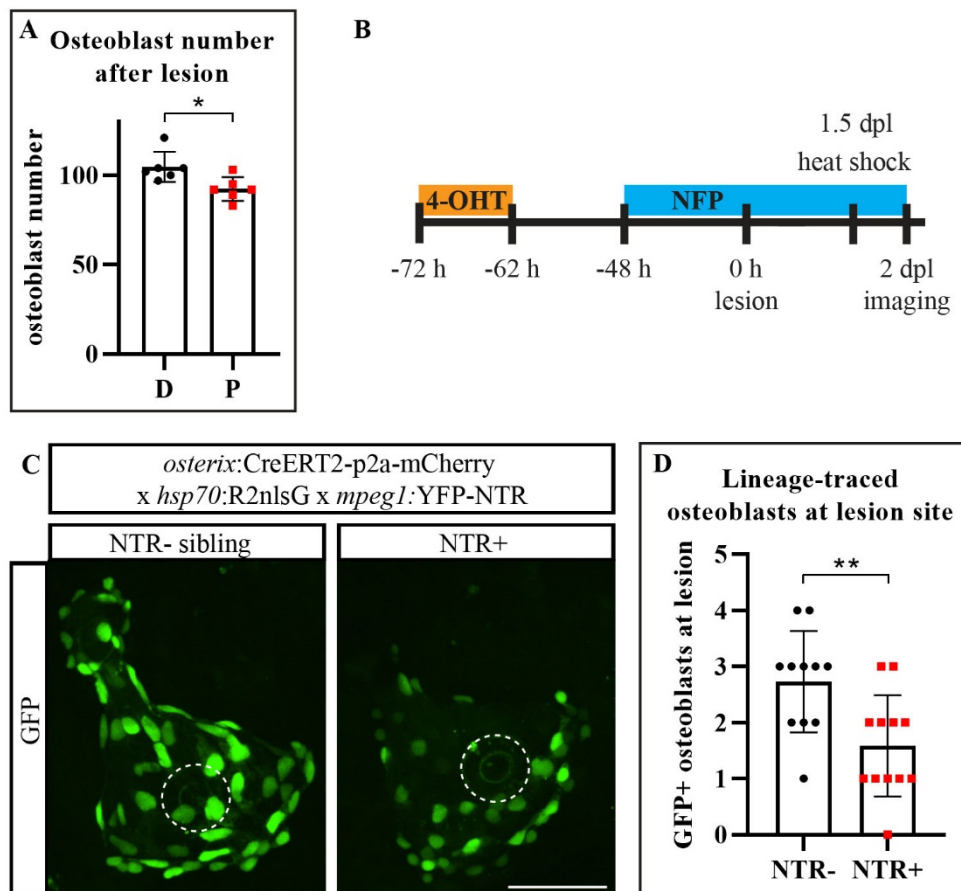

438

439

440

441

442

443

444

445

446

447

**Fig. 9: Macrophage-ablation affects the recovery of osteoblasts after ablation.** **A:** Quantification of the number of opercular osteoblasts in 7 dpf transgenic *osterix:nGFP* larval zebrafish after prednisolone treatment. Mean + s.d. Welch's t-test: \*p = 0.019. n = 6. **B:** Scheme on NTR-mediated macrophage ablation combined with a CreERT2-loxP mediated lineage tracing approach of osteoblasts. Osteoblast ablation was performed at 6 dpf/72 h post 4-OHT/48 h post NFP treatment start. One day later, a single heat shock was used to visualize nuclear GFP expression. **C:** Representative images of 4-OHT and NFP-treated *osterix:CreERT2-p2a-mCherry* x *hsp70:R2nlsG* x *mpeg1:YFP-NTR* zebrafish and their NTR- siblings at 2 dpl. Macrophage ablation reduces the number of pre-existing committed opercular osteoblasts located at the lesion site (white dashed line). Scale bar = 50  $\mu$ m. **D:** Quantification of experiment shown in C. Mean + s.d. Welch's t-test: \*\*p = 0.006. n = 11-12. D = DMSO, P = prednisolone.

448

## 449 Discussion

450

451

452

453

454

Small teleost fish such as zebrafish and medaka have proven extremely useful to monitor bone tissue during regeneration *in vivo* (Chatani et al., 2011; Cox et al., 2018; De Simone et al., 2021; Knopf et al., 2011; Phan, Liu, et al., 2020), and to observe immune cell behavior in response to infection and non-sterile soft tissue injury (Barros-Becker et al., 2017; Gray et al., 2011; Gurevich et al., 2018; Li et al., 2012). Zebrafish lesion paradigms, mostly non-sterile,

455 have been developed for several tissues, also to study immune cell responses *in vivo* (Nguyen-  
456 Chi et al., 2015; Ohnmacht et al., 2016; Renshaw et al., 2006). Many studies make use of larval  
457 fin fold resection ('tail fin amputation') (Demy et al., 2017; LeBert et al., 2015; Nguyen-Chi et  
458 al., 2017; Niethammer et al., 2009). The fin fold has a simple architecture, consists of two  
459 epithelial layers innervated by sensory axons, encompasses actinotrichia and interspersed  
460 mesenchyme, and lacks bone entirely (O'Brien et al., 2012). Here, we have established an  
461 approach to specifically ablate bone forming osteoblasts in larval zebrafish *in vivo*, which we  
462 used to evaluate the immune cell response towards this spatially confined, tissue-specific  
463 lesion. Our model represents a valuable tool to study the immune cell response after  
464 microscopic bone lesion and provides the possibility to evaluate the recruitment and behavior  
465 of immune cells in contributing to a balanced bone cell turnover and repair.

466  
467 Recovery after cell loss is essential to ensure tissue health and the same applies to osteoblasts  
468 whose function is essential for maintenance and repair of the skeleton (X. Feng & McDonald,  
469 2011). Many cell populations have shown the potential to generate osteoblasts, summarized  
470 under the term skeletal stem cells in mammals (Serowoky et al., 2020). In zebrafish,  
471 osteoblasts self-renew by dedifferentiation and proliferation of mature osteoblasts (Geurtzen  
472 et al., 2014; Knopf et al., 2011; Sousa et al., 2011), but also become recruited from progenitor  
473 cell pools (Ando et al., 2017; Mcdonald et al., 2021). Notably, proliferation of osteoblasts  
474 could be observed in response to laser-assisted osteoblast ablation, albeit not frequently. In  
475 addition to proliferation, stretching of cellular processes of pre-existing *osterix*<sup>+</sup> osteoblasts  
476 towards the lesion site at 1 dpl and lineage tracing of the very same cells confirm contribution  
477 of committed osteoblasts. A rapid contractile response mediated by actomyosin forces, such  
478 as seen in the resected fin fold within less than an hour (Mateus et al., 2012), is not seen. This  
479 can potentially be explained by the comparatively firm adhesion of osteoblasts to their matrix.  
480 In the future, cell cycle studies, e.g. by labeling cells with bromodeoxyuridine and anti-  
481 phosphohistone 3 antibodies, should be performed to quantify the contribution of  
482 proliferating cells to osteoblast recovery. A potential alternative source of osteoblasts located  
483 at the lesion site may be cells that generate osteoblasts *de novo* from a precursor-like state  
484 as seen in mammals, i.e. stromal cells or other cells reminiscent of mammalian skeletal stem  
485 cells, which needs to be tested in the future.

486 We did not detect developmental delays of bone formation after osteoblast lesion. This might  
487 be because of quick osteoblast recovery and due to the fact that opercular growth at the  
488 investigated developmental stages is comparatively slow; the volume of the opercular bone  
489 matrix increases only by about 10 % from 7 to 8 dpf (**Fig. 1C**). Furthermore, opercular growth  
490 mostly proceeds along the ventral-posterior bone edge with osteoblasts strongly  
491 concentrating in this region (Kimmel et al., 2010) which was also enriched for lineage-traced  
492 osteoblasts (**Fig. 2C**). The ventral-posterior edge of the opercle was not targeted in our lesion  
493 paradigm. It will be interesting to test whether osteoblast ablation in this region leads to a  
494 growth defect, and if so, how many osteoblasts would need to be ablated to evoke  
495 alterations.

496  
497 One important process after wounding is the production and release of cytokines attracting  
498 immune cells, which is essential to initiate tissue repair (Duffield, 2003). *Mmp9*, one of the  
499 signals induced after tissue damage (LeBert et al., 2015; Matsubara et al., 1991), triggers  
500 leukocyte migration (Purwar et al., 2008). Similarly, high ROS amounts are released after  
501 wounding (Roy et al., 2006; Yoo et al., 2012) and stimulate recruitment of immune cells in  
502 zebrafish (Y. Feng et al., 2010; Niethammer et al., 2009). Sustained ROS levels are also  
503 observed after adult fin amputation, which includes the resection of bone (Gauron et al.,  
504 2013), and after resection of the larval notochord (Romero et al., 2018). Both *mmp9* activity  
505 and ROS production were induced by sterile laser-mediated osteoblast ablation as established  
506 in this work, which illustrates that ablation of less than a dozen cells causes a wound response  
507 comparable to the one seen after non-sterile, more severe wounding. However, *mmp9*  
508 activity was visualized with the help of a transgenic reporter, which requires several hours to  
509 mirror transcript activity of the *mmp9* gene, during which GFP protein is produced (Hazelrigg  
510 et al., 1998). For this reason, we cannot infer how fast *mmp9* message and protein are formed  
511 and whether *Mmp9* release indeed plays a role in early leukocyte attraction. Conversely, rapid  
512 ROS release was visualized real time, and treatment with the antioxidant DPI reduced  
513 leukocyte attraction, indicating that ROS are involved. Classic work on zebrafish fin fold  
514 resection (Niethammer et al., 2009) and tumor-transformed skin cells (Y. Feng et al., 2010)  
515 demonstrated the importance of ROS-mediated immune cell attraction, which is likely to  
516 occur short-range (Jelcic et al., 2017). ROS blockage in our experiments may either cause  
517 reduced ROS levels at the ablation site or reduce ROS levels in macrophages, and therefore



518 lead to impaired recruitment. Notably, ROS accumulate in macrophages and other leukocytes  
519 playing an important role in leukocyte polarization (Robinson, 2008; Tan et al., 2016).  
520 Moreover, ROS production plays a crucial role in bone homeostasis promoting  
521 osteoclastogenesis and bone resorption (Bai et al., 2005; Lee et al., 2005), and oxidative stress  
522 is strongly associated with bone pathologies such as osteoporosis (Baek et al., 2010).  
523 However, to our knowledge ROS have not been visualized at cellular resolution *in vivo* in bone  
524 before, making this the first study to successfully label ROS release after osteoblast cell death  
525 in a living organism. It remains unclear, whether increase of ROS in or by individual osteoblasts  
526 is sufficient to attract immune cells. In the future, new tools such as KillerRed will enable  
527 tissue and cell type specific generation of ROS (Formella et al., 2018; Teh et al., 2010) in the  
528 growing opercle without ablating the cells. This will lead to the further characterization of the  
529 impact of ROS on bone cell turnover and tissue homeostasis.

530

531 In case of tissue damage a rapid immune cell influx is essential for efficient cell and tissue  
532 clearance and to ensure proper inflammation resolution and healing (Duffield, 2003). Both  
533 neutrophils and macrophages were recruited to the site of laser-assisted osteoblast ablation.  
534 Neutrophils were recruited first, and macrophages followed shortly after, which is in  
535 agreement with previous work (Keightley et al., 2014; Kolaczowska & Kubes, 2013). The  
536 observed macrophages were tissue-resident, responded early, and might be responsible for  
537 later recruitment of monocyte-derived macrophages and other inflammatory leukocytes to  
538 the injury site (Davies et al., 2013). Moreover, the average speed of macrophages was  
539 comparable to previously reported zebrafish injury models (Barros-Becker et al., 2017; Ellett  
540 et al., 2011; Li et al., 2012). Furthermore, acquisition of *ctsk* expression in some macrophages,  
541 indicating osteoclast differentiation, was observed. A similar process was suggested to take  
542 place in medaka fish, in which RANKL (Receptor activator of NF- $\kappa$ B ligand) was ubiquitously  
543 overexpressed (Phan, Liu, et al., 2020; Phan, Tan, et al., 2020). Some caution is warranted, as  
544 *ctsk* also labels mesenchymal cells in some tissues (Debnath et al., 2018; Lu et al., 2020) and  
545 we observed immobile *ctsk:nlsMCherry+* nuclei at a distance from the opercle, in locations  
546 unlikely to contain osteoclasts (data not shown). It is noteworthy that conversion of  
547 macrophages to osteoclasts depends on inflammatory signals such as Tnf- $\alpha$  (Phan, Liu, et al.,  
548 2020). We detected increased expression of *tnf- $\alpha$*  in some macrophages recruited to the  
549 lesion site, and these cells are good candidates for differentiation into osteoclasts. Further

550 investigation of additional osteoclast-specific and inflammatory marker gene expression, such  
551 as of tartrate-resistant acid phosphatase, will reveal the importance of macrophage  
552 recruitment and inflammatory phenotype for osteoclastogenesis at the lesion site.

553 Macrophage contribution to wound healing is dependent on the subtype characteristics.  
554 Generally, the early wound-response is characterized by inflammatory macrophage action  
555 marked by inflammatory cytokine release and phagocytosis of dead cells and debris (Duffield,  
556 2003; Lieschke et al., 2001). Later phases are dominated by regenerative macrophage  
557 responses leading to inflammation resolution and tissue remodeling (Duffield, 2003; Novak &  
558 Koh, 2013). In zebrafish, transgenic reporter lines enable investigation of macrophage  
559 phenotypes throughout inflammation and its resolution (Ellett et al., 2011; Gray et al., 2011;  
560 Walton et al., 2015). Available tools showed that, similarly to the mammalian situation, two  
561 waves of macrophages (inflammatory and regenerative) emerge in soft zebrafish tissues after  
562 resection (Nguyen-Chi et al., 2017).

563 In this work, we evaluated the amount of activated and inflammatory macrophages at  
564 relatively early time points post cell ablation. Interestingly, increased *irg1*:GFP+ macrophages  
565 were already detected at 1 hpl indicating that these activated macrophages respond fast.  
566 While *Irg1* is not a direct read-out for the inflammatory macrophage phenotype, but instead  
567 labels activated macrophages (Sanderson et al., 2015), it is often expressed in a pro-  
568 inflammatory environment (Jamal Uddin et al., 2016) by pro-inflammatory macrophages  
569 (Sanderson et al., 2015). We therefore conclude that activated macrophages populate the  
570 lesion site early on and that they become polarized towards the inflammatory phenotype.  
571 Notably, only about 25 % of macrophages in the opercle area and at the lesion site were  
572 identified as inflammatory macrophages at 1 dpl, on the basis of *tnf-α*:GFP expression. This is  
573 in agreement with work on fin fold resected zebrafish, in which approximately 30 % of  
574 inflammatory macrophages were reported at 24 hours post amputation, although more  
575 inflammatory macrophages could be detected earlier (Nguyen-Chi et al., 2017). In our model,  
576 laser-assisted osteoblast ablation will allow to study the kinetics of the inflammatory  
577 response to cell death in bone tissue, in particular with respect to normal and dysregulated  
578 resolution of inflammation.

579

580 Tight regulation of the immune response is essential for wound healing and tissue repair, and  
581 overexerted actions can be harmful in many inflammatory disorders (Duffield, 2003). In the

582 bone microenvironment, a variety of inflammatory conditions and therapy-associated  
583 diseases such as rheumatoid arthritis and glucocorticoid-induced osteoporosis affect bone  
584 health (den Uyl et al., 2011; X. Feng & McDonald, 2011; Takayanagi, 2007). In order to develop  
585 novel therapies for such diseases and to counteract adverse effects of immunosuppressive  
586 treatment, it is crucial to precisely understand how immune cells are affected in these  
587 conditions. Zebrafish fin fold regeneration models combined with high dose glucocorticoid  
588 treatment (Chatzopoulou et al., 2016; C. J. Hall et al., 2014; Sharif et al., 2015) showed that  
589 glucocorticoids suppress the attraction of macrophages and neutrophils and impair tissue  
590 regeneration. Here, by using a previously established larval prednisolone administration  
591 regime (Geurtzen et al., 2017) on laser-ablated zebrafish larvae, we investigated the effect of  
592 glucocorticoids on immune cells *in vivo* in the context of bone cell turnover and microscopic  
593 bone repair. Particularly inflammatory macrophages were affected by prednisolone exposure,  
594 as reported previously (Cain & Cidlowski, 2017; Russo-Marie, 1992; Xie et al., 2019).  
595 Morphology, which can be used as a readout for activation and polarization status of  
596 macrophages (McWhorter et al., 2013), was evidently altered after prednisolone exposure.  
597 Inflammatory, activated macrophages display an amoeboid morphology with few dendrites  
598 while anti-inflammatory macrophages are more elongated and display more dendrites, also  
599 in zebrafish (Nguyen-Chi et al., 2015). Prednisolone exposure impaired the activated,  
600 amoeboid morphology of macrophages in our model. Consistently, *tnf- $\alpha$* :GFP+ macrophage  
601 numbers dropped in prednisolone treated zebrafish, similar to effects after fin fold resection  
602 and concomitant treatment (Nguyen-Chi et al., 2015).  
603 Contrasting data have been obtained concerning the effect of glucocorticoids on immune cell  
604 migration, also varying depending on the glucocorticoid used (Chatzopoulou et al., 2016;  
605 Sharif et al., 2015; Xie et al., 2019). While beclomethasone leaves macrophage migration  
606 unaffected in fin fold resected zebrafish (Chatzopoulou et al., 2016; Xie et al., 2019), high dose  
607 dexamethasone treatment reduces macrophage recruitment in the same model (Sharif et al.,  
608 2015). Here, we used prednisolone, a third synthetic glucocorticoid, to test for its  
609 immunosuppressive effects after individual osteoblast ablation. Treatment led to a reduced  
610 macrophage migratory ability in terms of maximum speed and number of recruited  
611 macrophages. This is in agreement with previous results on adult bony fin ray-amputated  
612 zebrafish, in which prednisolone treatment led to impaired macrophage accumulation in fin  
613 regenerates (Geurtzen et al., 2017).

614 High dose glucocorticoids are known to strongly affect osteoblasts by inducing osteoblast  
615 apoptosis while impairing osteoblast proliferation and maturation (den Uyl et al., 2011;  
616 Weinstein, 2012). To date, it is unclear whether these anti-osteogenic effects are exclusively  
617 mediated directly or whether alteration of macrophage number and phenotype contribute to  
618 these effects. During mammalian bone repair, macrophages promote osteoblast  
619 differentiation and bone mineralization (Pettit et al., 2008), in particular after fracture  
620 (Batoon et al., 2017). In our lesion model, ablation of macrophages led to reduced osteoblast  
621 numbers at the lesion site, reflecting either impaired proliferation or migration of *osterix*+  
622 osteoblasts. Decreased osteoblast numbers in the developing opercle after macrophage  
623 ablation point to a similar compromising effect, which was also observed in fractured mouse  
624 bones after tissue-resident macrophage ablation (Alexander et al., 2011; Batoon et al., 2017).  
625 This illustrates the capacity of tissue-resident macrophages to support bone formation in  
626 mammalian and non-mammalian vertebrates. In the future, it will be interesting to test  
627 osteoblast and macrophage- specific knockout tools in zebrafish, e.g. to delete the  
628 glucocorticoid receptor *nr3c1*, or to target prednisolone to phagocytic macrophages  
629 specifically to decipher the indirect negative impact of glucocorticoid exposure on osteoblasts  
630 via immune cells. Moreover, it will be interesting to compare anti-migratory effects of  
631 different synthetic glucocorticoids on macrophages and neutrophils across different  
632 wounding assays and tissues, specifically when taking bone tissue into account.

633

634 *In vivo* and intravital imaging approaches in rodent species have progressed a lot in recent  
635 years. Tissues such as the lung (Yang et al., 2018), kidney (Peti-Peterdi et al., 2016) but also  
636 bone (J. Kim & Bixel, 2020) have been investigated. A variety of studies examined the  
637 interaction of bone producing cells with immune cells by using *in vivo* microscopy (Tetsuo  
638 Hasegawa et al., 2019; Ishii et al., 2010; Kikuta et al., 2013). Ishii and colleagues used two-  
639 photon confocal laser microscopy to observe osteoclast precursor migration to bone tissues  
640 in homeostatic conditions (Ishii et al., 2009). Similar approaches, some of which making use  
641 of bone explants, facilitated imaging of osteoblast – osteoclast interactions, osteoprogenitors  
642 during cranial bone defect repair and the mechanism of osteocyte embedding into bone ECM  
643 (Dallas & Moore, 2020; Furuya et al., 2018; Huang et al., 2015; Shiflett et al., 2019). Albeit  
644 these advancements, limiting factors in terms of imaging depth persist for *in vivo* imaging of

645 rodent bone tissue. Furthermore, the ability to resolve cellular dynamics in terms of cell shape  
646 changes, migratory behavior and cell to cell contacts remains challenging. This is also true for  
647 long-term imaging of rodent bone tissue *in vivo*, which, in contrast, can be performed up to  
648 several days in zebrafish larvae (Kaufmann et al., 2012).

649 Laser-assisted approaches have a long tradition in zebrafish since they provide good tissue  
650 penetration (Morsch et al., 2017) and fine spatio-temporal control of manipulation (Johnson  
651 et al., 2011). This makes the system useful for a wide array of experiments triggering  
652 regeneration, such as by laser-induced axotomy (Hu et al., 2018), induction of thrombosis  
653 (Jagadeeswaran et al., 2006), cell ablation in the brain (Sieger et al., 2012), spinal cord  
654 (Dehnisch Ellström et al., 2019), kidney (Johnson et al., 2011), intestine (Ohno et al., 2021)  
655 and heart (Matrone et al., 2013). In bone, only few laser-assisted ablation assays have been  
656 employed. Two assays were performed in non-osseous tissues - the wound epidermis  
657 covering regenerating bone elements in fins (J. Zhang et al., 2012) and hypothalamic neurons  
658 during early development (Suarez-Bregua et al., 2017), which lead to altered fin ray patterning  
659 and mineralization defects in craniofacial bones, respectively. Substantial osteoblast ablation  
660 was performed by Chang & Franz-Odenaal in selected skeletal condensations of developing  
661 infraorbital bones in older zebrafish larvae (10 mm standard length, age > one month,  
662 (Singleman & Holtzman, 2014)). While the bones recovered, they were however smaller and  
663 aberrant in shape (Chang & Franz-Odenaal, 2014). In our assay, ablation of a maximum of  
664 10 % of opercular osteoblasts was subcritical and did not compromise bone growth, which  
665 could also reflect the ability of younger individuals to better compensate for tissue damage  
666 during development.

667 Our model represents a novel approach to study bone cell turnover in homeostasis and repair.  
668 We show that ablation of only few osteoblasts is sufficient to initiate an immune cell response  
669 of graded severity, depending on how many cells were ablated initially. This is especially  
670 interesting considering that osteoblast senescence and cell death are frequent processes in  
671 bone homeostasis with osteoblasts having a relatively short life span (Manolagas, 2000). The  
672 consequences of isolated osteoblast death during homeostasis and medical treatment, as  
673 well as their replacement, are not particularly clear. In recent years, osteocytes have gained  
674 center stage as sensors of biomechanical strain and players in modeling and remodeling of  
675 bone (BONEWALD, 2007; Kennedy et al., 2012; Ru & Wang, 2020). However, osteoblasts,  
676 mirroring the pre-osteocytic cell stage, have suggested to play a similar role in sensation of

677 microscopic tissue damage. This is illustrated by the fact that anosteocytic bones undergo  
678 modeling in teleost fish (medaka (Ofer et al., 2019)), which is mediated by Sclerostin levels in  
679 bone lining osteoblasts, and is supported by the observation that osteocytic bones do not  
680 necessarily undergo remodeling (Currey et al., 2017). Another aspect of osteoblast biology is  
681 their declined performance in aged bone, which is partly mediated by accumulation of ROS  
682 (H. N. Kim et al., 2018), and rising levels of glucocorticoids (M Almeida & O'Brien, 2013). Both  
683 factors, which we modeled with the help of laser-assisted osteoblast ablation, influence bone  
684 health directly and indirectly, by impairing osteo-immune cell communication (Ahmad et al.,  
685 2019; Lean et al., 2005). While we are aware that the presented assay makes use of a growing  
686 bone of simple structure, we suggest to use it to *in vivo* monitor the processes of osteoblast  
687 recovery after cell death, and to study the varying contribution of immune cells to bone repair  
688 and integrity. In addition, interaction of leukocyte cell types, such as the process of reverse  
689 migration of neutrophils first observed in zebrafish (Mathias et al., 2006) and later  
690 demonstrated in mammals (Woodfin et al., 2011), and the generation of  
691 macrophage/monocyte-derived osteoclasts in response to ROS and increased stress signaling  
692 can be studied. Finally, the model enables studies on the contribution of different osteoblast  
693 progenitor cell pools to osteoblast recovery and can potentially be used in slightly older  
694 animals to visualize the plasticity of mature osteoblasts undergoing dedifferentiation.

695

## 696 **Summary**

697 In conclusion, we present a comprehensive study on a new laser-assisted osteoblast ablation  
698 paradigm, which enables researchers to study osteoblast – immune cell interactions *in vivo*.  
699 We investigated the specific characteristics of this sterile lesion assay and show that a varying  
700 number of osteoblasts can be ablated and that recovery occurs fast when 10 % of the  
701 opercular osteoblasts are ablated. Using spinning disc confocal microscopy, we tracked the  
702 immediate response of neutrophils and macrophages, which migrated into the site of ablation  
703 at which ROS were released quickly. A significant number of recruited macrophages displayed  
704 an inflammatory phenotype, which was inhibited by pharmacological glucocorticoid  
705 exposure. Moreover, glucocorticoid-treatment significantly impaired macrophage migration  
706 into the region of interest and affected osteoblast recovery. Ablation of *mpeg1+* macrophages  
707 impaired osteoblast repopulation of the injured area suggesting a bone-anabolic macrophage  
708 function. Laser-assisted ablation of osteoblasts can be used to better understand microscopic

709 bone repair during tissue homeostasis and to explore the relevance of leukocyte recruitment  
710 in this process.

711

## 712 **Material & Methods**

### 713 Animal experiments

714 All procedures were performed in accordance with the animal handling and research  
715 regulations of the Landesdirektion Sachsen (Permit numbers AZ DD25-5131/354/87, DD25-  
716 5131/450/4, 25-5131/496/56 and amendments).

717

### 718 Fish lines and husbandry

719 The following previously described transgenic zebrafish lines were used: *osterix:nGFP*  
720 (*Tg(Ola.Sp7:NLS-GFP)<sup>zf132</sup>*)(Spoorendonk et al., 2008), histone Cherry (*Tg(h2afv:h2afv-*  
721 *mCherry)<sup>tud7</sup>*)(Knopf et al., 2011), *mmp9:EGFP* (*TgBAC(mmp9:EGFP-NTR)<sup>tyt206</sup>*)(Ando et al.,  
722 2017), *mpo:GFP* (*Tg(BACmpo:gfp)<sup>i114</sup>*)(Renshaw et al., 2006), *mpeg1:mCherry*  
723 (*Tg(mpeg1:mCherry)<sup>gl23</sup>*)(Ellett et al., 2011), *mpeg1:YFP-NTR* (*Tg(mpeg1:NTR-*  
724 *EYFP)<sup>w202</sup>*)(Petrie et al., 2014), *TgBAC(tnfa:GFP)<sup>pd1028</sup>*)(Marjoram et al., 2015), *irg1:EGFP*  
725 (*Tg(acod1:EGFP)<sup>nz26</sup>*)(Sanderson et al., 2015), *osterix:CreERT2-p2a-mCherry*  
726 (*Tg(Ola.sp7:CreERT2-P2A-mCherry)<sup>tud8</sup>*)(Knopf et al., 2011), *hsp70:R2nlsG* (*Tg(hsp70l:loxP-*  
727 *DsRed2-loxP-nlsEGFP)<sup>tud9</sup>*)(Knopf et al., 2011), *kdrl:CFP* (*Tg(kdrl:CFP)<sup>zf410</sup>*)(Hess & Boehm,  
728 2012).

729 For creation of the *ctsK:nlsmCherry* transgenic zebrafish line a fragment containing the 4 kb  
730 promotor region and start of exon1 of the *Danio rerio cathepsin K* was cloned upstream of  
731 *nlsmCherry* into a pBluescript-based vector containing Tol2 transposable sites flanking the  
732 insert (kindly provided by Anke Weber and Stefan Hans). The following primers were used for  
733 amplification: ATATCCTCTCACAGGACATCAAACAGCGAAACGAG (adding an EcoNI restriction  
734 site) and TATAGCCCGCCTGAGCAAGAAGAAATGCACC (adding a FseI restriction site). EcoNI  
735 and FseI restriction enzymes were used for cloning. A transgenic line was created by injecting  
736 the plasmid DNA with transposase mRNA into fertilized eggs. Throughout larval growth

737 transgene expression was detectable in the pharyngeal region comparable to another  
738 previously published zebrafish *ctsK*-line (Sharif et al., 2014).  
739 Fish were bred and maintained as described (Brand M et al., 2002).

740

741 Lesion paradigm and *in vivo* imaging

742 In order to perform osteoblast ablations, zebrafish larvae were anesthetized in 0.02 % Tricaine  
743 (MS222, Merck, Taufkirchen, Germany) and embedded in 1 % Low melt agarose (LMA, Biozym  
744 Scientific GmbH, Hessisch Oldendorf, Germany) in E3 in a glass bottom microwell dish (35  
745 mm, 14 mm microwell, MatTek Corporation, Ashland, MA, USA). To immobilize the larvae, 20  
746  $\mu$ l of 0,4 % Tricaine were added to 1.5 ml LMA (final concentration 0.005 % Tricaine). They  
747 were laid on the side to position the opercle region close to the glass bottom for imaging  
748 accessibility. For prednisolone-treatment the larvae were kept in prednisolone (Merck,  
749 Taufkirchen, Germany) or DMSO (Merck, Taufkirchen, Germany) control conditions by adding  
750 autoclaved E3 with 0.01% Tricaine and 25  $\mu$ M prednisolone or 0.05% DMSO to the dish after  
751 the LMA had solidified, otherwise E3 with 0.01% Tricaine was added. The osteoblast lesion  
752 was performed using a UV laser adjusted to the Andor spinning disk system equipped with a  
753 Yokogawa CSU-X1, Zeiss AxioObserver.Z1 and an iXon+ camera facilitating simultaneous  
754 imaging with LabVIEW 2009. The same laser cutter settings were used throughout the study,  
755 consisting of 2.0 intensity, 20 pulses/shot, four shots/ $\mu$ m<sup>2</sup> and two shooting circles of 15 and  
756 7  $\mu$ m  $\varnothing$ . Cell death was confirmed by loss of GFP signal. Afterwards the larvae were carefully  
757 removed from the LMA and kept in E3 until further imaging was performed. Non-lesioned  
758 controls were mock-treated i.e. they were also anesthetized and embedded in LMA.

759 Short-term imaging was performed with LabVIEW 2009 with the setup described above, while  
760 long term imaging was performed with Andor iQ2 software or a Dragonfly spinning disk  
761 equipped with a sCMOS camera and Fusion software. In both imaging approaches, the same  
762 laser power, gain settings and exposure times were used. Larvae were kept in LMA after the  
763 lesion and were continuously imaged at different time intervals. Data were processed with  
764 Image J Software version 1.53c or Arivis Vision4D version 2.12.6. and 3.3.0 where mentioned,  
765 in order to obtain images and movies. For tracking of macrophages Arivis Vision4D version  
766 2.12.6. was used. First, the data were filtered using a convolution enhancement filter which



767 was followed by drift correction using the GFP channel. Afterwards, individual macrophages  
768 were tracked using the blob finder and Brownian motion segment tracker.  
769 Only macrophages whose complete cell bodies were visible and which very present in the  
770 field of view for more than 30 min were tracked. At the end, the tracking was manually  
771 verified, aberrant tracks were excluded and separated tracks were merged.

772

### 773 Drug treatments

774 Prednisolone treatment of zebrafish larvae was carried out as previously described (Geurtzen  
775 et al., 2017).

776 DPI (Diphenyleneiodonium chloride, Merck, Taufkirchen, Germany) treatment of 3 dpf  
777 zebrafish larvae before finfold resection was carried out as previously described (Robertson  
778 et al., 2016). DPI treatment on 6 dpf larvae started 5 h before laser ablation and continued  
779 throughout the live imaging period with the same concentration used on 3 dpf larvae (100  
780  $\mu$ M).

781 Nifupirinol (NFP) treatment was performed as previously described (Bergemann et al., 2018).  
782 A 2.5 mM stock solution of NFP in DMSO was prepared and stored at -20°C. Larval zebrafish  
783 were soaked in 2.5  $\mu$ M NFP for up to 6 consecutive days in the dark at 28°C.

784

### 785 Fin fold resection

786 3 dpf larvae were anesthetized and fin fold resection was performed as previously described  
787 (Isles et al., 2019).

788

### 789 Staining techniques

790 Alizarin red staining of the live zebrafish larvae was performed as previously described  
791 (Kimmel et al., 2010). For quantification of the opercle volume the surface tool in Imaris 8.1  
792 was used to reproduce the alizarin red stained area surface and to calculate the  
793 corresponding volume.

794 CellROX staining was conducted as previously described (Kulkarni et al., 2018), however,  
795 instead of CellROX green, CellROX orange (ThermoFisher Scientific, Waltham, MA, USA) was  
796 used. After staining, larvae were embedded in 1% LMA, lesioned and live imaged for 15 min.

797

798 Osteoblast fate mapping

799 *osterix:CreERT2-p2a-mCherry, hsp70:R2nlsG* double transgenic 5 dpf larvae were soaked in  
800 10  $\mu$ M 4-hydroxytamoxifen (4-OHT, Merck, Taufkirchen, Germany) or the corresponding  
801 amount of vehicle control ethanol for 10 h. Larvae were lesioned at 6 dpf. One or two days  
802 later (7 or 8 dpf), larvae were heat shocked once at 37°C for 1 h. Roughly 12 h post heat shock  
803 the larvae were analyzed for recombination by the appearance of nlsGFP+ cells.

804

805 Quantification of GFP and mCherry expression, stereomicroscopy

806 For quantification of GFP and mCherry expression post lesion the larvae were anesthetized  
807 with 0.02% Tricaine (MS222) and again embedded in 1% LMA in a glass bottom dish. The  
808 larvae were imaged once with an Andor Dragonfly Spinning Disk equipped with a sCMOS  
809 camera. For each time point a different set off larvae was used. Identical settings for  
810 magnification, exposure time, pinhole size, laser power and z-stack interval were used  
811 throughout the whole experiment. Intensity measurements were conducted using the Plot  
812 Profile Tool in Image J Software version 1.53c.

813 Stereomicroscopy of fin fold resected zebrafish larvae and the head region of *ctsk:nlsmCherry*  
814 transgenic zebrafish was performed with the help of a Zeiss SteREO Discovery.V12 equipped  
815 with a AxioCam MRm and AxioVison software version 4.7.1.0.

816

817 Image processing

818 Brightness, contrast and levels were adjusted using Adobe Photoshop CS6 and 2020 software.  
819 Images were processed with identical settings using the legacy option.

820

821 Statistical analysis

822 Statistical analysis was run using GraphPad Prism 8.3.1. Unpaired two-sided t-tests with  
823 Welch's correction, Tukey's multiple comparison one-way ANOVA and Sidak's multiple  
824 comparison two-way ANOVA tests were performed wherever applicable.

825

826

## 827 **Acknowledgements**

828 We would like to thank Isabell Weber for help in establishing the laser-assisted lesion assay  
829 and Michael Brand for helpful discussions. We are very grateful to Atsushi Kawakami (Tokyo,  
830 Japan), Michel Bagnat (Durham, UK) and C.J. Hall (Auckland, New Zealand) for sharing  
831 transgenic fish. Special thanks goes to Stefan Grill, Nicholas Chartier and Lokesh Pimpale for  
832 providing access to their Spinning Disk Microscope and technical support. We would also like  
833 to thank Anke Weber and Stefan Hans for sharing reagents. Our thanks also goes to the Light  
834 Microscopy core facility at the Center for Molecular and Cellular Bioengineering at the TU  
835 Dresden and Marika Fischer, Jitka Michling and Daniela Moegel for excellent fish care. We  
836 thank Henriette Knopf for proofreading the manuscript.

837

## 838 **Author contributions**

839 Experiments were designed and analyzed by KG, AD and FK. KG and AD performed  
840 experiments. KG and FK wrote the manuscript and accept responsibility for the integrity of  
841 data analysis.

842

## 843 **Competing interests**

844 The authors declare no competing financial or non-financial interest.

845

## 846 **Funding**

847 This work was supported by the DFG Transregio 67 (project 387653785) and the DFG SPP 2084  
848  $\mu$ Bone (project KN 1102/2-1). The work at the TU Dresden is co-financed with tax revenues  
849 based on the budget agreed by the Saxonian Landtag.

850

## 851 **References**

852 Ahi, E. P., Walker, B. S., Lassiter, C. S., & Jónsson, Z. O. (2016). Investigation of the effects of

- 853 estrogen on skeletal gene expression during zebrafish larval head development. *PeerJ*,  
854 4, e1878. <https://doi.org/10.7717/PEERJ.1878>
- 855 Ahmad, M., Hachemi, Y., Paxian, K., Mengele, F., Koenen, M., & Tuckermann, J. (2019). A  
856 Jack of All Trades: Impact of Glucocorticoids on Cellular Cross-Talk in  
857 Osteoimmunology. *Frontiers in Immunology*, 10, 2460.  
858 <https://doi.org/10.3389/fimmu.2019.02460>
- 859 Akiva, A., Kerschnitzki, M., Pinkas, I., Wagermaier, W., Yaniv, K., Fratzl, P., Addadi, L., &  
860 Weiner, S. (2016). Mineral Formation in the Larval Zebrafish Tail Bone Occurs via an  
861 Acidic Disordered Calcium Phosphate Phase. *Journal of the American Chemical Society*,  
862 138(43), 14481–14487. <https://doi.org/10.1021/jacs.6b09442>
- 863 Alexander, K. A., Chang, M. K., Maylin, E. R., Kohler, T., Müller, R., Wu, A. C., Van Rooijen, N.,  
864 Sweet, M. J., Hume, D. A., Raggatt, L. J., & Pettit, A. R. (2011). Osteal macrophages  
865 promote in vivo intramembranous bone healing in a mouse tibial injury model. *Journal*  
866 *of Bone and Mineral Research : The Official Journal of the American Society for Bone*  
867 *and Mineral Research*, 26(7), 1517–1532. <https://doi.org/10.1002/jbmr.354>
- 868 Almeida, M., & O'Brien, C. A. (2013). Basic Biology of Skeletal Aging: Role of Stress Response  
869 Pathways. *The Journals of Gerontology Series A: Biological Sciences and Medical*  
870 *Sciences*, 68(10), 1197–1208. <https://doi.org/10.1093/gerona/glt079>
- 871 Almeida, Maria. (2012). Aging mechanisms in bone. *BoneKEy Reports*, 1(7).  
872 <https://doi.org/10.1038/bonekey.2012.102>
- 873 Ando, K., Shibata, E., Hans, S., Brand, M., & Kawakami, A. (2017). Osteoblast Production by  
874 Reserved Progenitor Cells in Zebrafish Bone Regeneration and Maintenance.  
875 *Developmental Cell*. <https://doi.org/10.1016/j.devcel.2017.10.015>
- 876 Andrew, J. G., Andrew, S. M., Freemont, A. J., & Marsh, D. R. (1994). Inflammatory cells in  
877 normal human fracture healing. *Acta Orthopaedica Scandinavica*, 65(4), 462–466.  
878 <http://www.ncbi.nlm.nih.gov/pubmed/7976298>
- 879 Baek, K. H., Oh, K. W., Lee, W. Y., Lee, S. S., Kim, M. K., Kwon, H. S., Rhee, E. J., Han, J. H.,  
880 Song, K. H., Cha, B. Y., Lee, K. W., & Kang, M. Il. (2010). Association of oxidative stress  
881 with postmenopausal osteoporosis and the effects of hydrogen peroxide on osteoclast

- 882 formation in human bone marrow cell cultures. *Calcified Tissue International*, 87(3),  
883 226–235. <https://doi.org/10.1007/s00223-010-9393-9>
- 884 Bai, X.-C., Lu, D., Liu, A.-L., Zhang, Z.-M., Li, X.-M., Zou, Z.-P., Zeng, W.-S., Cheng, B.-L., & Luo,  
885 S.-Q. (2005). *Reactive Oxygen Species Stimulates Receptor Activator of NF-B Ligand*  
886 *Expression in Osteoblast\**. <https://doi.org/10.1074/jbc.M409332200>
- 887 Banerji, R., Eble, D. M., Iovine, M. K., & Skibbens, R. V. (2016). Esco2 regulates *cx43*  
888 expression during skeletal regeneration in the zebrafish fin. *Developmental Dynamics*,  
889 245(1), 7–21. <https://doi.org/10.1002/dvdy.24354>
- 890 Barros-Becker, F., Lam, P.-Y., Fisher, R., & Huttenlocher, A. (2017). Live imaging reveals  
891 distinct modes of neutrophil and macrophage migration within interstitial tissues.  
892 *Journal of Cell Science*, jcs.206128. <https://doi.org/10.1242/jcs.206128>
- 893 Batoon, L., Millard, S. M., Wullschleger, M. E., Preda, C., Wu, A. C.-K., Kaur, S., Tseng, H.-W.,  
894 Hume, D. A., Levesque, J.-P., Raggatt, L. J., & Pettit, A. R. (2017). CD169 + macrophages  
895 are critical for osteoblast maintenance and promote intramembranous and  
896 endochondral ossification during bone repair. *Biomaterials*.  
897 <https://doi.org/10.1016/j.biomaterials.2017.10.033>
- 898 Bergemann, D., Massoz, L., Bourdouxhe, J., Carril Pardo, C. A., Voz, M. L., Peers, B., &  
899 Manfroid, I. (2018). Nifurpirinol: A more potent and reliable substrate compared to  
900 metronidazole for nitroreductase-mediated cell ablations. *Wound Repair and*  
901 *Regeneration*. <https://doi.org/10.1111/wrr.12633>
- 902 BONEWALD, L. F. (2007). Osteocytes as Dynamic Multifunctional Cells. *Annals of the New*  
903 *York Academy of Sciences*, 1116(1), 281–290. <https://doi.org/10.1196/annals.1402.018>
- 904 Brand M, Granato M, & Nüsslein-Volhard C. (2002). Keeping and raising zebrafish. In  
905 Nüsslein-Volhard C & Dahm R (Eds.), *Zebrafish: A Practical Approach* (pp. 7–37).  
906 Oxford University Press.
- 907 Brittijn, S. A., Duivesteijn, S. J., Belmamoune, M., Bertens, L. F. M., Bitter, W., de Bruijn, J. D.,  
908 Champagne, D. L., Cuppen, E., Flik, G., Vandenbroucke-Grauls, C. M., Janssen, R. A. J.,  
909 de Jong, I. M. L., de Kloet, E. R., Kros, A., Meijer, A. H., Metz, J. R., van der Sar, A. M.,  
910 Schaaf, M. J. M., Schulte-Merker, S., ... Richardson, M. K. (2009). Zebrafish development

- 911 and regeneration: new tools for biomedical research. *The International Journal of*  
912 *Developmental Biology*, 53(5–6), 835–850. <https://doi.org/10.1387/ijdb.082615sb>
- 913 Buehring, B., Viswanathan, R., Binkley, N., & Busse, W. (2013). Glucocorticoid-induced  
914 osteoporosis: An update on effects and management. *Journal of Allergy and Clinical*  
915 *Immunology*, 132(5), 1019–1030. <https://doi.org/10.1016/J.JACI.2013.08.040>
- 916 Cain, D. W., & Cidlowski, J. A. (2017). Immune regulation by glucocorticoids. *Nature Reviews*  
917 *Immunology*, 17(4), 233–247. <https://doi.org/10.1038/nri.2017.1>
- 918 Callaway, D. A., & Jiang, J. X. (2015). Reactive oxygen species and oxidative stress in  
919 osteoclastogenesis, skeletal aging and bone diseases. In *Journal of Bone and Mineral*  
920 *Metabolism* (Vol. 33, Issue 4, pp. 359–370). Springer Tokyo.  
921 <https://doi.org/10.1007/s00774-015-0656-4>
- 922 Carvalho, F. R., Fernandes, A. R., Cancela, M. L., & Gavaia, P. J. (2017). Improved  
923 regeneration and de novo bone formation in a diabetic zebrafish model treated with  
924 paricalcitol and cinacalcet. *Wound Repair and Regeneration*, 25(3), 432–442.  
925 <https://doi.org/10.1111/wrr.12536>
- 926 Chang, C. T., & Franz-Odenaal, T. A. (2014). Perturbing the developing skull: Using laser  
927 ablation to investigate the robustness of the infraorbital bones in zebrafish (*Danio*  
928 *rerio*). *BMC Developmental Biology*, 14(1), 44. [https://doi.org/10.1186/s12861-014-](https://doi.org/10.1186/s12861-014-0044-7)  
929 [0044-7](https://doi.org/10.1186/s12861-014-0044-7)
- 930 Charles, J. F., & Nakamura, M. C. (2014). *Bone and the Innate Immune System*.  
931 <https://doi.org/10.1007/s11914-014-0195-2>
- 932 Chassot, B., Pury, D., & Jaźwińska, A. (2016). Zebrafish fin regeneration after cryoinjury-  
933 induced tissue damage. *Biology Open*, 5(6), 819–828.  
934 <https://doi.org/10.1242/bio.016865>
- 935 Chatani, M., Takano, Y., & Kudo, A. (2011). Osteoclasts in bone modeling, as revealed by in  
936 vivo imaging, are essential for organogenesis in fish. *Developmental Biology*, 360(1),  
937 96–109. <https://doi.org/10.1016/j.ydbio.2011.09.013>
- 938 Chatzopoulou, A., Heijmans, J. P. M., Burgerhout, E., Oskam, N., Spaik, H. P., Meijer, A. H.,

- 939 & Schaaf, M. J. M. (2016). Glucocorticoid-Induced Attenuation of the Inflammatory  
940 Response in Zebrafish. *Endocrinology*, 157(7), 2772–2784.  
941 <https://doi.org/10.1210/en.2015-2050>
- 942 Chazaud, B. (2014). Macrophages: Supportive cells for tissue repair and regeneration.  
943 *Immunobiology*, 219(3), 172–178. <https://doi.org/10.1016/j.imbio.2013.09.001>
- 944 Chen, A. T., & Zon, L. I. (2009). Zebrafish blood stem cells. *Journal of Cellular Biochemistry*,  
945 108(1), 35–42. <https://doi.org/10.1002/jcb.22251>
- 946 Cox, B. D., De Simone, A., Tornini, V. A., Singh, S. P., Di Talia, S., & Poss, K. D. (2018). In Toto  
947 Imaging of Dynamic Osteoblast Behaviors in Regenerating Skeletal Bone. *Current*  
948 *Biology*, 28(24), 3937–3947.e4. <https://doi.org/10.1016/J.CUB.2018.10.052>
- 949 Cabbage, C. C., & Mabee, P. M. (1996). Development of the cranium and paired fins in the  
950 zebrafish *Danio rerio* (Ostariophysi, Cyprinidae). *Journal of Morphology*, 229(2), 121–  
951 160. [https://doi.org/10.1002/\(SICI\)1097-4687\(199608\)229:2<121::AID-  
JMOR1>3.0.CO;2-4](https://doi.org/10.1002/(SICI)1097-4687(199608)229:2<121::AID-<br/>952 JMOR1>3.0.CO;2-4)
- 953 Curado, S., Stainier, D. Y. R., & Anderson, R. M. (2008). Nitroreductase-mediated cell/tissue  
954 ablation in zebrafish: a spatially and temporally controlled ablation method with  
955 applications in developmental and regeneration studies. *Nature Protocols*, 3(6), 948–  
956 954. <https://doi.org/10.1038/nprot.2008.58>
- 957 Currey, J. D., Dean, M. N., & Shahar, R. (2017). Revisiting the links between bone  
958 remodelling and osteocytes: insights from across phyla. *Biological Reviews*, 92(3),  
959 1702–1719. <https://doi.org/10.1111/brv.12302>
- 960 Dallas, S. L., & Moore, D. S. (2020). Using confocal imaging approaches to understand the  
961 structure and function of osteocytes and the lacunocanalicular network. In *Bone* (Vol.  
962 138, p. 115463). Elsevier Inc. <https://doi.org/10.1016/j.bone.2020.115463>
- 963 Dallas, S. L., Veno, P. A., & Tiede-Lewis, L. A. M. (2019). Live cell imaging of bone cell and  
964 organ cultures. In *Methods in Molecular Biology* (Vol. 1914, pp. 467–506). Humana  
965 Press Inc. [https://doi.org/10.1007/978-1-4939-8997-3\\_27](https://doi.org/10.1007/978-1-4939-8997-3_27)
- 966 Davies, L. C., Jenkins, S. J., Allen, J. E., & Taylor, P. R. (2013). Tissue-resident macrophages. In

- 967 *Nature Immunology* (Vol. 14, Issue 10, pp. 986–995). Nature Publishing Group.  
968 <https://doi.org/10.1038/ni.2705>
- 969 De Simone, A., Evanitsky, M. N., Hayden, L., Cox, B. D., Wang, J., Tornini, V. A., Ou, J., Chao,  
970 A., Poss, K. D., & Di Talia, S. (2021). Control of osteoblast regeneration by a train of Erk  
971 activity waves. *Nature*, *590*(7844), 129. <https://doi.org/10.1038/s41586-020-03085-8>
- 972 Debnath, S., Yallowitz, A. R., McCormick, J., Lalani, S., Zhang, T., Xu, R., Li, N., Liu, Y., Yang, Y.  
973 S., Eiseman, M., Shim, J. H., Hameed, M., Healey, J. H., Bostrom, M. P., Landau, D. A., &  
974 Greenblatt, M. B. (2018). Discovery of a periosteal stem cell mediating  
975 intramembranous bone formation. *Nature*, *562*(7725), 133–139.  
976 <https://doi.org/10.1038/s41586-018-0554-8>
- 977 Dehnisch Ellström, I., Spulber, S., Hultin, S., Norlin, N., Ceccatelli, S., Hultling, C., & Uhlén, P.  
978 (2019). Spinal cord injury in zebrafish induced by near-infrared femtosecond laser  
979 pulses. *Journal of Neuroscience Methods*, *311*, 259–266.  
980 <https://doi.org/10.1016/j.jneumeth.2018.10.035>
- 981 DeLaurier, A., Alvarez, C. L., & Wiggins, K. J. (2019). hdac4 mediates perichondral ossification  
982 and pharyngeal skeleton development in the zebrafish. *PeerJ*, *7*, e6167.  
983 <https://doi.org/10.7717/peerj.6167>
- 984 Dempster, D. (2006). Anatomy and functions of the adult skeleton. *Primer of the Metabolic*  
985 *Bone Diseases and Disorders of Mineral Metabolism*.  
986 [http://www.homepages.ucl.ac.uk/~ucgatma/Anat3048/PAPERS etc/ASBMR Primer Ed](http://www.homepages.ucl.ac.uk/~ucgatma/Anat3048/PAPERS%20etc/ASBMR%20Primer%20Ed%206/Ch%201-7%20-%20Morphogenesis,%20Structure%20&%20Cell%20Biology%20of%20Bone.pdf)  
987 [6/Ch 1-7 - Morphogenesis, Structure & Cell Biology of Bone.pdf](http://www.homepages.ucl.ac.uk/~ucgatma/Anat3048/PAPERS%20etc/ASBMR%20Primer%20Ed%206/Ch%201-7%20-%20Morphogenesis,%20Structure%20&%20Cell%20Biology%20of%20Bone.pdf)
- 988 Demy, D. Lou, Tauzin, M., Lancino, M., Le Cabec, V., Redd, M., Murayama, E., Maridonneau-  
989 Parini, I., Trede, N., & Herbomel, P. (2017). Trim33 is essential for macrophage and  
990 neutrophil mobilization to developmental or inflammatory cues. *Journal of Cell Science*,  
991 *130*(17), 2797–2807. <https://doi.org/10.1242/jcs.203471>
- 992 den Uyl, D., Bultink, I. E. M., & Lems, W. F. (2011). Glucocorticoid-induced osteoporosis.  
993 *Clinical and Experimental Rheumatology*, *29*(5 Suppl 68), S93-8.  
994 <http://www.ncbi.nlm.nih.gov/pubmed/22018192>
- 995 Diez-Roux, G., & Lang, R. A. (1997). Macrophages induce apoptosis in normal cells in vivo.



- 996        *Development*, 124(18), 3633–3638.
- 997        Domazetovic, V. (2017). Oxidative stress in bone remodeling: role of antioxidants. *Clinical*  
998        *Cases in Mineral and Bone Metabolism*, 14(2), 209.  
999        <https://doi.org/10.11138/ccmbm/2017.14.1.209>
- 1000        Du, S. J., Frenkel, V., Kindschi, G., & Zohar, Y. (2001). Visualizing Normal and Defective Bone  
1001        Development in Zebrafish Embryos Using the Fluorescent Chromophore Calcein.  
1002        *Developmental Biology*, 238(2), 239–246. <https://doi.org/10.1006/dbio.2001.0390>
- 1003        Duffield, J. S. (2003). The inflammatory macrophage: a story of Jekyll and Hyde. *Clinical*  
1004        *Science (London, England : 1979)*, 104(1), 27–38. <https://doi.org/10.1042/>
- 1005        Ellett, F., & Lieschke, G. J. (2010). Zebrafish as a model for vertebrate hematopoiesis.  
1006        *Current Opinion in Pharmacology*, 10(5), 563–570.  
1007        <https://doi.org/10.1016/J.COPH.2010.05.004>
- 1008        Ellett, F., Pase, L., Hayman, J. W., Andrianopoulos, A., & Lieschke, G. J. (2011). mpeg1  
1009        promoter transgenes direct macrophage-lineage expression in zebrafish. *Blood*, 117(4),  
1010        e49-56. <https://doi.org/10.1182/blood-2010-10-314120>
- 1011        Feng, X., & McDonald, J. M. (2011). Disorders of bone remodeling. *Annual Review of*  
1012        *Pathology*, 6, 121–145. <https://doi.org/10.1146/annurev-pathol-011110-130203>
- 1013        Feng, Y., Santoriello, C., Mione, M., Hurlstone, A., & Martin, P. (2010). Live Imaging of Innate  
1014        Immune Cell Sensing of Transformed Cells in Zebrafish Larvae: Parallels between Tumor  
1015        Initiation and Wound Inflammation. *PLoS Biology*, 8(12), e1000562.  
1016        <https://doi.org/10.1371/journal.pbio.1000562>
- 1017        Fiedler, I. A. K., Schmidt, F. N., Wölfel, E. M., Plumeyer, C., Milovanovic, P., Gioia, R., Tonelli,  
1018        F., Bale, H. A., Jähn, K., Besio, R., Forlino, A., & Busse, B. (2018). Severely Impaired Bone  
1019        Material Quality in Chihuahua Zebrafish Resembles Classical Dominant Human  
1020        Osteogenesis Imperfecta. *Journal of Bone and Mineral Research*, 33(8), 1489–1499.  
1021        <https://doi.org/10.1002/jbmr.3445>
- 1022        Formella, I., Svahn, A. J., Radford, R. A. W., Don, E. K., Cole, N. J., Hogan, A., Lee, A., Chung,  
1023        R. S., & Morsch, M. (2018). Real-time visualization of oxidative stress-mediated

- 1024 neurodegeneration of individual spinal motor neurons in vivo. *Redox Biology*, *19*, 226–  
1025 234. <https://doi.org/10.1016/j.redox.2018.08.011>
- 1026 Fraser, L.-A., & Adachi, J. D. (2009). Glucocorticoid-induced osteoporosis: treatment update  
1027 and review. *Therapeutic Advances in Musculoskeletal Disease*, *1*(2), 71–85.  
1028 <https://doi.org/10.1177/1759720X09343729>
- 1029 Furuya, M., Kikuta, J., Fujimori, S., Seno, S., Maeda, H., Shirazaki, M., Uenaka, M., Mizuno,  
1030 H., Iwamoto, Y., Morimoto, A., Hashimoto, K., Ito, T., Isogai, Y., Kashii, M., Kaito, T.,  
1031 Ohba, S., Chung, U. Il, Lichtler, A. C., Kikuchi, K., ... Ishii, M. (2018). Direct cell-cell  
1032 contact between mature osteoblasts and osteoclasts dynamically controls their  
1033 functions in vivo. *Nature Communications*, *9*(1), 1–12. [https://doi.org/10.1038/s41467-](https://doi.org/10.1038/s41467-017-02541-w)  
1034 [017-02541-w](https://doi.org/10.1038/s41467-017-02541-w)
- 1035 Gauron, C., Rampon, C., Bouzaffour, M., Ipendey, E., Teillon, J., Volovitch, M., & Vriza, S.  
1036 (2013). Sustained production of ROS triggers compensatory proliferation and is  
1037 required for regeneration to proceed. *Scientific Reports*, *3*(1), 1–9.  
1038 <https://doi.org/10.1038/srep02084>
- 1039 Geurtzen, K., Knopf, F., Wehner, D., Huitema, L. F. A., Schulte-Merker, S., & Weidinger, G.  
1040 (2014). Mature osteoblasts dedifferentiate in response to traumatic bone injury in the  
1041 zebrafish fin and skull. *Development*, *141*(11), 2225–2234.  
1042 <https://doi.org/10.1242/DEV.105817>
- 1043 Geurtzen, K., Vernet, A., Freidin, A., Rauner, M., Hofbauer, L. C., Schneider, J. E., Brand, M.,  
1044 & Knopf, F. (2017). Immune Suppressive and Bone Inhibitory Effects of Prednisolone in  
1045 Growing and Regenerating Zebrafish Tissues. *Journal of Bone and Mineral Research*,  
1046 *32*(12), 2476–2488. <https://doi.org/10.1002/jbmr.3231>
- 1047 Gistelincq, C., Kwon, R. Y., Malfait, F., Symoens, S., Harris, M. P., Henke, K., Hawkins, M. B.,  
1048 Fisher, S., Sips, P., Guillemyn, B., Bek, J. W., Vermassen, P., De Saffel, H., Witten, P. E.,  
1049 Weis, M. A., De Paepe, A., Eyre, D. R., Willaert, A., & Coucke, P. J. (2018). Zebrafish type  
1050 I collagen mutants faithfully recapitulate human type I collagenopathies. *Proceedings of*  
1051 *the National Academy of Sciences of the United States of America*, *115*(34), E8037–  
1052 E8046. <https://doi.org/10.1073/pnas.1722200115>

- 1053 Gray, C., Loynes, C. A., Whyte, M. K. B., Crossman, D. C., Renshaw, S. A., & Chico, T. J. A.  
1054 (2011). Simultaneous intravital imaging of macrophage and neutrophil behaviour  
1055 during inflammation using a novel transgenic zebrafish. *Thrombosis and Haemostasis*,  
1056 *105*(5), 811–819. <https://doi.org/10.1160/TH10-08-0525>
- 1057 Gurevich, D. B., Severn, C. E., Twomey, C., Greenhough, A., Cash, J., Toyne, A. M., Mellor, H.,  
1058 & Martin, P. (2018). Live imaging of wound angiogenesis reveals macrophage  
1059 orchestrated vessel sprouting and regression. *The EMBO Journal*, *37*(13), e97786.  
1060 <https://doi.org/10.15252/emj.201797786>
- 1061 Hachemi, Y., Rapp, A. E., Picke, A.-K., Weidinger, G., Ignatius, A., & Tuckermann, J. (2018).  
1062 Molecular mechanisms of glucocorticoids on skeleton and bone regeneration after  
1063 fracture. *Journal of Molecular Endocrinology*, *61*(1), R75–R90.  
1064 <https://doi.org/10.1530/JME-18-0024>
- 1065 Hall, C., Flores, M. V., Chien, A., Davidson, A., Crosier, K., & Crosier, P. (2009). Transgenic  
1066 zebrafish reporter lines reveal conserved Toll-like receptor signaling potential in  
1067 embryonic myeloid leukocytes and adult immune cell lineages. *Journal of Leukocyte*  
1068 *Biology*, *85*(5), 751–765. <https://doi.org/10.1189/jlb.0708405>
- 1069 Hall, C., Flores, M. V., Storm, T., Crosier, K., & Crosier, P. (2007). The zebrafish lysozyme C  
1070 promoter drives myeloid-specific expression in transgenic fish. *BMC Developmental*  
1071 *Biology*, *7*, 42. <https://doi.org/10.1186/1471-213X-7-42>
- 1072 Hall, C. J., Boyle, R. H., Astin, J. W., Flores, M. V., Oehlers, S. H., Sanderson, L. E., Ellett, F.,  
1073 Lieschke, G. J., Crosier, K. E., & Crosier, P. S. (2013). Immunoresponsive gene 1  
1074 augments bactericidal activity of macrophage-lineage cells by regulating  $\beta$ -oxidation-  
1075 dependent mitochondrial ros production. *Cell Metabolism*, *18*(2), 265–278.  
1076 <https://doi.org/10.1016/j.cmet.2013.06.018>
- 1077 Hall, C. J., Boyle, R. H., Sun, X., Wicker, S. M., Misa, J. P., Krissansen, G. W., Print, C. G.,  
1078 Crosier, K. E., & Crosier, P. S. (2014). Epidermal cells help coordinate leukocyte  
1079 migration during inflammation through fatty acid-fuelled matrix metalloproteinase  
1080 production. *Nature Communications*, *5*, 3880. <https://doi.org/10.1038/ncomms4880>
- 1081 Hammond, C. L., & Moro, E. (2012). Using transgenic reporters to visualize bone and

- 1082 cartilage signaling during development in vivo. *Frontiers in Endocrinology*, 3, 91.  
1083 <https://doi.org/10.3389/fendo.2012.00091>
- 1084 Hans, S., Kaslin, J., Freudenreich, D., & Brand, M. (2009). Temporally-controlled site-specific  
1085 recombination in zebrafish. *PLoS ONE*, 4(2).  
1086 <https://doi.org/10.1371/journal.pone.0004640>
- 1087 Hasegawa, Tetsuo, Kikuta, J., & Ishii, M. (2019). Imaging the bone-immune cell interaction in  
1088 bone destruction. *Frontiers in Immunology*, 10(MAR), 596.  
1089 <https://doi.org/10.3389/fimmu.2019.00596>
- 1090 Hasegawa, Tomoya, Hall, C. J., Crosier, P. S., Abe, G., Kawakami, K., Kudo, A., & Kawakami, A.  
1091 (2017). Transient inflammatory response mediated by interleukin-1 $\beta$  is required for  
1092 proper regeneration in zebrafish fin fold. *ELife*, 6. <https://doi.org/10.7554/eLife.22716>
- 1093 Hashimoto, K., Kaito, T., Kikuta, J., & Ishii, M. (2020). Intravital imaging of orthotopic and  
1094 ectopic bone. In *Inflammation and Regeneration* (Vol. 40, Issue 1, p. 26). BioMed  
1095 Central Ltd. <https://doi.org/10.1186/s41232-020-00135-6>
- 1096 Hayes, A. J., Reynolds, S., Nowell, M. A., Meakin, L. B., Habicher, J., Ledin, J., Bashford, A.,  
1097 Caterson, B., & Hammond, C. L. (2013). Spinal deformity in aged zebrafish is  
1098 accompanied by degenerative changes to their vertebrae that resemble osteoarthritis.  
1099 *PLoS One*, 8(9), e75787. <https://doi.org/10.1371/journal.pone.0075787>
- 1100 Hazelrigg, T., Liu, N., Hong, Y., & Wang, S. (1998). *GFP Expression in Drosophila Tissues: Time*  
1101 *Requirements for Formation of a Fluorescent Product*.
- 1102 He, M., Halima, M., Xie, Y., Schaaf, M. J. M., Meijer, A. H., & Wang, M. (2020). Ginsenoside  
1103 Rg1 Acts as a Selective Glucocorticoid Receptor Agonist with Anti-Inflammatory Action  
1104 without Affecting Tissue Regeneration in Zebrafish Larvae. *Cells*, 9(5), 1107.  
1105 <https://doi.org/10.3390/cells9051107>
- 1106 Herbomel, P., Thisse, B., & Thisse, C. (2001). Zebrafish Early Macrophages Colonize Cephalic  
1107 Mesenchyme and Developing Brain, Retina, and Epidermis through a M-CSF Receptor-  
1108 Dependent Invasive Process. *Developmental Biology*, 238(2), 274–288.  
1109 <https://doi.org/10.1006/DBIO.2001.0393>

- 1110 Hess, I., & Boehm, T. (2012). Intravital Imaging of Thymopoiesis Reveals Dynamic Lympho-  
1111 Epithelial Interactions. *Immunity*, 36(2), 298–309.  
1112 <https://doi.org/10.1016/j.immuni.2011.12.016>
- 1113 Horwood, N. J. (2016). Macrophage Polarization and Bone Formation: A review. *Clinical*  
1114 *Reviews in Allergy & Immunology*, 51(1), 79–86. <https://doi.org/10.1007/s12016-015->  
1115 8519-2
- 1116 Hu, B. bing, Chen, M., Huang, R. chen, Huang, Y. bin, Xu, Y., Yin, W., Li, L., & Hu, B. (2018). In  
1117 vivo imaging of mauthner axon regeneration, remyelination and synapses re-  
1118 establishment after laser axotomy in zebrafish larvae. *Experimental Neurology*, 300,  
1119 67–73. <https://doi.org/10.1016/j.expneurol.2017.10.028>
- 1120 Huang, C., Ness, V. P., Yang, X., Chen, H., Luo, J., Brown, E. B., & Zhang, X. (2015).  
1121 Spatiotemporal Analyses of Osteogenesis and Angiogenesis via Intravital Imaging in  
1122 Cranial Bone Defect Repair. *Journal of Bone and Mineral Research*, 30(7), 1217–1230.  
1123 <https://doi.org/10.1002/jbmr.2460>
- 1124 Huemer, K., Squirrell, J. M., Swader, R., Lebert, D. C., Huttenlocher, A., & Eliceiri, K. W.  
1125 (2017). ZWEDGI: Wounding and Entrapment Device for Imaging Live Zebrafish Larvae.  
1126 *Zebrafish*, 14(1), 42–50. <https://doi.org/10.1089/zeb.2016.1323>
- 1127 Ishii, M., Egen, J. G., Klauschen, F., Meier-Schellersheim, M., Saeki, Y., Vacher, J., Proia, R. L.,  
1128 & Germain, R. N. (2009). Sphingosine-1-phosphate mobilizes osteoclast precursors and  
1129 regulates bone homeostasis. *Nature*, 458(7237), 524–528.  
1130 <https://doi.org/10.1038/nature07713>
- 1131 Ishii, M., Fujimori, S., Kaneko, T., & Kikuta, J. (2013). Dynamic live imaging of bone: Opening  
1132 a new era with “bone histodynametry.” *Journal of Bone and Mineral Metabolism*,  
1133 31(5), 507–511. <https://doi.org/10.1007/s00774-013-0437-x>
- 1134 Ishii, M., Kikuta, J., Shimazu, Y., Meier-Schellersheim, M., & Germain, R. N. (2010).  
1135 Chemorepulsion by blood S1P regulates osteoclast precursor mobilization and bone  
1136 remodeling in vivo. *Journal of Experimental Medicine*, 207(13), 2793–2798.  
1137 <https://doi.org/10.1084/jem.20101474>
- 1138 Isles, H. M., Herman, K. D., Robertson, A. L., Loynes, C. A., Prince, L. R., Elks, P. M., &

- 1139 Renshaw, S. A. (2019). The CXCL12/CXCR4 Signaling Axis Retains Neutrophils at  
1140 Inflammatory Sites in Zebrafish. *Frontiers in Immunology*, *10*, 1784.  
1141 <https://doi.org/10.3389/fimmu.2019.01784>
- 1142 Jagadeeswaran, P., Paris, R., & Rao, P. (2006). Laser-induced thrombosis in zebrafish larvae:  
1143 a novel genetic screening method for thrombosis. *Methods in Molecular Medicine*, *129*,  
1144 187–195. <https://doi.org/10.1385/1-59745-213-0:187>
- 1145 Jamal Uddin, M., Joe, Y., Kim, S.-K., Oh Jeong, S., Ryter, S. W., Pae, H.-O., & Chung, H. T.  
1146 (2016). IRG1 induced by heme oxygenase-1/carbon monoxide inhibits LPS-mediated  
1147 sepsis and pro-inflammatory cytokine production. *Cellular & Molecular Immunology*,  
1148 *13*(2), 170–179. <https://doi.org/10.1038/cmi.2015.02>
- 1149 Javidan, Y., & Schilling, T. F. (2004). Development of cartilage and bone. *Methods in Cell*  
1150 *Biology*, *76*, 415–436. <http://www.ncbi.nlm.nih.gov/pubmed/15602885>
- 1151 Jelcic, M., Enyedi, B., Xavier, J. B., & Niethammer, P. (2017). Image-Based Measurement of  
1152 H<sub>2</sub>O<sub>2</sub> Reaction-Diffusion in Wounded Zebrafish Larvae. *Biophysical Journal*, *112*(9),  
1153 2011–2018. <https://doi.org/10.1016/j.bpj.2017.03.021>
- 1154 Jilka, R. L., Weinstein, R. S., Parfitt, A. M., & Manolagas, S. C. (2007). Perspective:  
1155 Quantifying Osteoblast and Osteocyte Apoptosis: Challenges and Rewards. *Journal of*  
1156 *Bone and Mineral Research*, *22*(10), 1492–1501. <https://doi.org/10.1359/jbmr.070518>
- 1157 Johnson, C. S., Holzemer, N. F., & Wingert, R. A. (2011). Laser ablation of the zebrafish  
1158 pronephros to study renal epithelial regeneration. *Journal of Visualized Experiments* :  
1159 *JoVE*, *54*, 2845. <https://doi.org/10.3791/2845>
- 1160 Kaufmann, A., Mickoleit, M., Weber, M., & Huysken, J. (2012). Multilayer mounting enables  
1161 long-term imaging of zebrafish development in a light sheet microscope. *Development*  
1162 *(Cambridge)*, *139*(17), 3242–3247. <https://doi.org/10.1242/dev.082586>
- 1163 Keightley, M.-C., Wang, C.-H., Pazhakh, V., & Lieschke, G. J. (2014). Delineating the roles of  
1164 neutrophils and macrophages in zebrafish regeneration models. *The International*  
1165 *Journal of Biochemistry & Cell Biology*, *56*, 92–106.  
1166 <https://doi.org/10.1016/j.biocel.2014.07.010>

- 1167 Kennedy, O. D., Herman, B. C., Laudier, D. M., Majeska, R. J., Sun, H. B., & Schaffler, M. B.  
1168 (2012). Activation of resorption in fatigue-loaded bone involves both apoptosis and  
1169 active pro-osteoclastogenic signaling by distinct osteocyte populations. *Bone*, *50*(5),  
1170 1115–1122. <https://doi.org/10.1016/j.bone.2012.01.025>
- 1171 Kikuta, J., Kawamura, S., Okiji, F., Shirazaki, M., Sakai, S., Saito, H., & Ishii, M. (2013).  
1172 Sphingosine-1-phosphate-mediated osteoclast precursor monocyte migration is a  
1173 critical point of control in antibone-resorptive action of active vitamin D. *Proceedings of*  
1174 *the National Academy of Sciences of the United States of America*, *110*(17), 7009–7013.  
1175 <https://doi.org/10.1073/pnas.1218799110>
- 1176 Kim, H. N., Iyer, S., Ring, R., & Almeida, M. (2018). The Role of FoxOs in Bone Health and  
1177 Disease. In *Current Topics in Developmental Biology* (Vol. 127, pp. 149–163). Academic  
1178 Press Inc. <https://doi.org/10.1016/bs.ctdb.2017.10.004>
- 1179 Kim, J., & Bixel, M. G. (2020). Intravital Multiphoton Imaging of the Bone and Bone Marrow  
1180 Environment. *Cytometry Part A*, *97*(5), 496–503. <https://doi.org/10.1002/cyto.a.23937>
- 1181 Kimmel, C. B., DeLaurier, A., Ullmann, B., Dowd, J., & McFadden, M. (2010). Modes of  
1182 developmental outgrowth and shaping of a craniofacial bone in zebrafish. *PLoS One*,  
1183 *5*(3), e9475. <https://doi.org/10.1371/journal.pone.0009475>
- 1184 Klein-Nulend, J., & Bakker, A. D. (2007). Osteocytes: Mechanosensors of bone and  
1185 orchestrators of mechanical adaptation. In *Clinical Reviews in Bone and Mineral*  
1186 *Metabolism* (Vol. 5, Issue 4, pp. 195–209). Springer. [https://doi.org/10.1007/s12018-](https://doi.org/10.1007/s12018-008-9014-6)  
1187 [008-9014-6](https://doi.org/10.1007/s12018-008-9014-6)
- 1188 Knopf, F., Hammond, C., Chekuru, A., Kurth, T., Hans, S., Weber, C. W., Mahatma, G., Fisher,  
1189 S., Brand, M., Schulte-Merker, S., & Weidinger, G. (2011). Bone Regenerates via  
1190 Dedifferentiation of Osteoblasts in the Zebrafish Fin. *Developmental Cell*, *20*(5), 713–  
1191 724. <https://doi.org/10.1016/j.devcel.2011.04.014>
- 1192 Kolaczowska, E., & Kubes, P. (2013). Neutrophil recruitment and function in health and  
1193 inflammation. In *Nature Reviews Immunology* (Vol. 13, Issue 3, pp. 159–175). Nature  
1194 Publishing Group. <https://doi.org/10.1038/nri3399>
- 1195 Kulkarni, A. A., Conteh, A. M., Sorrell, C. A., Mirmira, A., Tersey, S. A., Mirmira, R. G.,

- 1196 Linnemann, A. K., & Anderson, R. M. (2018). An In Vivo Zebrafish Model for  
1197 Interrogating ROS-Mediated Pancreatic  $\beta$ -Cell Injury, Response, and Prevention.  
1198 *Oxidative Medicine and Cellular Longevity*, 2018, 1324739.  
1199 <https://doi.org/10.1155/2018/1324739>
- 1200 Le Guyader, D., Redd, M. J., Colucci-Guyon, E., Murayama, E., Kissa, K., rie Briolat, V.,  
1201 Mordelet, E., Zapata, A., Shinomiya, H., & Herbomel, P. (2008). *Origins and*  
1202 *unconventional behavior of neutrophils in developing zebrafish*.  
1203 <https://doi.org/10.1182/2007>
- 1204 Lean, J. M., Jagger, C. J., Kirstein, B., Fuller, K., & Chambers, T. J. (2005). Hydrogen peroxide  
1205 is essential for estrogen-deficiency bone loss and osteoclast formation. *Endocrinology*,  
1206 146(2), 728–735. <https://doi.org/10.1210/en.2004-1021>
- 1207 LeBert, D. C., & Huttenlocher, A. (2014). Inflammation and wound repair. *Seminars in*  
1208 *Immunology*, 26(4), 315–320. <https://doi.org/10.1016/j.smim.2014.04.007>
- 1209 LeBert, D. C., Squirrell, J. M., Rindy, J., Broadbridge, E., Lui, Y., Zakrzewska, A., Eliceiri, K. W.,  
1210 Meijer, A. H., & Huttenlocher, A. (2015). Matrix metalloproteinase 9 modulates  
1211 collagen matrices and wound repair. *Development (Cambridge)*, 142(12), 2136–2146.  
1212 <https://doi.org/10.1242/dev.121160>
- 1213 Lee, N. K., Choi, Y. G., Baik, J. Y., Han, S. Y., Jeong, D. W., Bae, Y. S., Kim, N., & Lee, S. Y.  
1214 (2005). A crucial role for reactive oxygen species in RANKL-induced osteoclast  
1215 differentiation. *Blood*, 106(3), 852–859. <https://doi.org/10.1182/blood-2004-09-3662>
- 1216 Leibovich, S. J., & Ross, R. (1975). The role of the macrophage in wound repair. A study with  
1217 hydrocortisone and antimacrophage serum. In *American Journal of Pathology* (Vol. 78,  
1218 Issue 1).
- 1219 Lewis, G. M., & Kucenas, S. (2013). Motor nerve transection and time-lapse imaging of glial  
1220 cell behaviors in live zebrafish. *Journal of Visualized Experiments : JoVE*, 76, 50621.  
1221 <https://doi.org/10.3791/50621>
- 1222 Li, L., Yan, B., Shi, Y.-Q., Zhang, W.-Q., & Wen, Z.-L. (2012). Live imaging reveals differing  
1223 roles of macrophages and neutrophils during zebrafish tail fin regeneration. *The Journal*  
1224 *of Biological Chemistry*, 287(30), 25353–25360.



- 1225 <https://doi.org/10.1074/jbc.M112.349126>
- 1226 Lieschke, G. J., Oates, A. C., Crowhurst, M. O., Ward, A. C., & Layton, J. E. (2001).  
1227 Morphologic and functional characterization of granulocytes and macrophages in  
1228 embryonic and adult zebrafish. *Blood*, *98*(10), 3087–3096.  
1229 <https://doi.org/10.1182/BLOOD.V98.10.3087>
- 1230 Lu, P. N., Moreland, T., Christian, C. J., Lund, T. C., Steet, R. A., & Flanagan-Steet, H. (2020).  
1231 Inappropriate cathepsin K secretion promotes its enzymatic activation driving heart  
1232 and valve malformation. *JCI Insight*, *5*(20). <https://doi.org/10.1172/jci.insight.133019>
- 1233 Manolagas, S. C. (2000). Birth and Death of Bone Cells: Basic Regulatory Mechanisms and  
1234 Implications for the Pathogenesis and Treatment of Osteoporosis <sup>1</sup>. *Endocrine Reviews*,  
1235 *21*(2), 115–137. <https://doi.org/10.1210/edrv.21.2.0395>
- 1236 Mari-Beffa, M., Santamaría, J. A., Murciano, C., Santos-Ruiz, L., Andrades, J. A., Guerado, E.,  
1237 & Becerra, J. (2007). Zebrafish fins as a model system for skeletal human studies.  
1238 *TheScientificWorldJournal*, *7*, 1114–1127. <https://doi.org/10.1100/tsw.2007.190>
- 1239 Marjoram, L., Alvers, A., Deerhake, M. E., Bagwell, J., Mankiewicz, J., Cocchiaro, J. L.,  
1240 Beerman, R. W., Willer, J., Sumigray, K. D., Katsanis, N., Tobin, D. M., Rawls, J. F., Goll,  
1241 M. G., & Bagnat, M. (2015). Epigenetic control of intestinal barrier function and  
1242 inflammation in zebrafish. *Proceedings of the National Academy of Sciences of the*  
1243 *United States of America*, *112*(9), 2770–2775.  
1244 <https://doi.org/10.1073/pnas.1424089112>
- 1245 Marsell, R., & Einhorn, T. A. (2011). The biology of fracture healing. *Injury*, *42*(6), 551–555.  
1246 <https://doi.org/10.1016/j.injury.2011.03.031>
- 1247 Martins, R. R., Ellis, P. S., MacDonald, R. B., Richardson, R. J., & Henriques, C. M. (2019).  
1248 Resident Immunity in Tissue Repair and Maintenance: The Zebrafish Model Coming of  
1249 Age. *Frontiers in Cell and Developmental Biology*, *7*, 12.  
1250 <https://doi.org/10.3389/fcell.2019.00012>
- 1251 Mateus, R., Pereira, T., Sousa, S., de Lima, J. E., Pascoal, S., Saúde, L., & Jacinto, A. (2012). In  
1252 Vivo Cell and Tissue Dynamics Underlying Zebrafish Fin Fold Regeneration. *PLoS ONE*,  
1253 *7*(12), e51766. <https://doi.org/10.1371/journal.pone.0051766>

- 1254 Mathew, L. K., Sengupta, S., Kawakami, A., Andreasen, E. A., Löhr, C. V, Loynes, C. A.,  
1255 Renshaw, S. A., Peterson, R. T., & Tanguay, R. L. (2007). Unraveling tissue regeneration  
1256 pathways using chemical genetics. *The Journal of Biological Chemistry*, 282(48), 35202–  
1257 35210. <https://doi.org/10.1074/jbc.M706640200>
- 1258 Mathias, J. R., Dodd, M. E., Walters, K. B., Yoo, S. K., Ranheim, E. A., & Huttenlocher, A.  
1259 (2009). Characterization of zebrafish larval inflammatory macrophages. *Developmental*  
1260 *and Comparative Immunology*, 33(11), 1212–1217.  
1261 <https://doi.org/10.1016/j.dci.2009.07.003>
- 1262 Mathias, J. R., Perrin, B. J., Liu, T.-X., Kanki, J., Look, A. T., & Huttenlocher, A. (2006).  
1263 Resolution of inflammation by retrograde chemotaxis of neutrophils in transgenic  
1264 zebrafish. *Journal of Leukocyte Biology*, 80(6), 1281–1288.  
1265 <https://doi.org/10.1189/jlb.0506346>
- 1266 Matrone, G., Taylor, J. M., Wilson, K. S., Baily, J., Love, G. D., Girkin, J. M., Mullins, J. J.,  
1267 Tucker, C. S., & Denvir, M. A. (2013). Laser-targeted ablation of the zebrafish embryonic  
1268 ventricle: A novel model of cardiac injury and repair. *International Journal of*  
1269 *Cardiology*, 168(4), 3913–3919. <https://doi.org/10.1016/j.ijcard.2013.06.063>
- 1270 Matsubara, M., Girard, M. T., Kublin, C. L., Cintron, C., & Fini, M. E. (1991). Differential roles  
1271 for two gelatinolytic enzymes of the matrix metalloproteinase family in the remodelling  
1272 cornea. *Developmental Biology*, 147(2), 425–439. [https://doi.org/10.1016/0012-1606\(91\)90300-R](https://doi.org/10.1016/0012-1606(91)90300-R)
- 1274 McColl, A., Michlewska, S., Dransfield, I., & Rossi, A. G. (2007). Effects of Glucocorticoids on  
1275 Apoptosis and Clearance of Apoptotic Cells. *The Scientific World Journal*, 7, 1165–1181.  
1276 <https://doi.org/10.1100/TSW.2007.224>
- 1277 McDonald, G. L. K., Wang, M., Hammond, C. L., Bergen, D. J. M., Brennan, C., & Torres-Perez,  
1278 J. V. (2021). *Pharmacological Manipulation of Early Zebrafish Skeletal Development*  
1279 *Shows an Important Role for Smad9 in Control of Skeletal Progenitor Populations*.  
1280 <https://doi.org/10.3390/biom11020277>
- 1281 McNulty, M. S., Bedell, V. M., Greenwood, T. M., Craig, T. A., Ekker, S. C., & Kumar, R. (2012).  
1282 Expression of sclerostin in the developing zebrafish (*Danio rerio*) brain and skeleton.

- 1283 *Gene Expression Patterns : GEP*, 12(7–8), 228–235.  
1284 <https://doi.org/10.1016/j.gep.2012.04.003>
- 1285 McWhorter, F. Y., Wang, T., Nguyen, P., Chung, T., & Liu, W. F. (2013). Modulation of  
1286 macrophage phenotype by cell shape. *Proceedings of the National Academy of Sciences*  
1287 *of the United States of America*, 110(43), 17253–17258.  
1288 <https://doi.org/10.1073/pnas.1308887110>
- 1289 Mitchell, R. E., Huitema, L. F. A., Skinner, R. E. H., Brunt, L. H., Severn, C., Schulte-Merker, S.,  
1290 & Hammond, C. L. (2013). New tools for studying osteoarthritis genetics in zebrafish.  
1291 *Osteoarthritis and Cartilage*, 21(2), 269–278.  
1292 <https://doi.org/10.1016/j.joca.2012.11.004>
- 1293 Morsch, M., Radford, R. A. W., Don, E. K., Lee, A., Hortle, E., Cole, N. J., & Chung, R. S. (2017).  
1294 Triggering cell stress and death using conventional UV laser confocal microscopy.  
1295 *Journal of Visualized Experiments*, 2017(120). <https://doi.org/10.3791/54983>
- 1296 Mosser, D. M., & Edwards, J. P. (2008). Exploring the full spectrum of macrophage  
1297 activation. *Nature Reviews. Immunology*, 8(12), 958–969.  
1298 <https://doi.org/10.1038/nri2448>
- 1299 Nguyen-Chi, M., Laplace-Builhé, B., Travnickova, J., Luz-Crawford, P., Tejedor, G., Lutfalla, G.,  
1300 Kissa, K., Jorgensen, C., & Djouad, F. (2017). TNF signaling and macrophages govern fin  
1301 regeneration in zebrafish larvae. *Cell Death & Disease*, 8(8), e2979.  
1302 <https://doi.org/10.1038/cddis.2017.374>
- 1303 Nguyen-Chi, M., Laplace-Builhe, B., Travnickova, J., Luz-Crawford, P., Tejedor, G., Phan, Q. T.,  
1304 Duroux-Richard, I., Levraud, J.-P., Kissa, K., Lutfalla, G., Jorgensen, C., & Djouad, F.  
1305 (2015). Identification of polarized macrophage subsets in zebrafish. *ELife*, 4, e07288.  
1306 <https://doi.org/10.7554/eLife.07288>
- 1307 Niethammer, P., Grabher, C., Look, A. T., & Mitchison, T. J. (2009). A tissue-scale gradient of  
1308 hydrogen peroxide mediates rapid wound detection in zebrafish. *Nature*, 459(7249),  
1309 996–999. <https://doi.org/10.1038/nature08119>
- 1310 Novak, M. L., & Koh, T. J. (2013). Macrophage phenotypes during tissue repair. *Journal of*  
1311 *Leukocyte Biology*, 93(6), 875–881. <https://doi.org/10.1189/jlb.1012512>

- 1312 O'Brien, G. S., Rieger, S., Wang, F., Smolen, G. A., Gonzalez, R. E., Buchanan, J., & Sagasti, A.  
1313 (2012). Coordinate development of skin cells and cutaneous sensory axons in zebrafish.  
1314 *Journal of Comparative Neurology*, 520(4), 816–831.  
1315 <https://doi.org/10.1002/cne.22791>
- 1316 Odén, A., McCloskey, E. V., Kanis, J. A., Harvey, N. C., & Johansson, H. (2015). Burden of high  
1317 fracture probability worldwide: secular increases 2010–2040. *Osteoporosis*  
1318 *International*, 26(9), 2243–2248. <https://doi.org/10.1007/s00198-015-3154-6>
- 1319 Ofer, L., Dean, M. N., Zaslansky, P., Kult, S., Shwartz, Y., Zaretsky, J., Griess-Fishheimer, S.,  
1320 Monsonego-Ornan, E., Zelzer, E., & Shahar, R. (2019). A novel nonosteocytic regulatory  
1321 mechanism of bone modeling. *PLOS Biology*, 17(2), e3000140.  
1322 <https://doi.org/10.1371/journal.pbio.3000140>
- 1323 Ohgo, S., Ichinose, S., Yokota, H., Sato-Maeda, M., Shoji, W., & Wada, N. (2019). Tissue  
1324 regeneration during lower jaw restoration in zebrafish shows some features of  
1325 epimorphic regeneration. *Development, Growth & Differentiation*, dgd.12625.  
1326 <https://doi.org/10.1111/dgd.12625>
- 1327 Ohnmacht, J., Yang, Y., Maurer, G. W., Barreiro-Iglesias, A., Tsarouchas, T. M., Wehner, D.,  
1328 Sieger, D., Becker, C. G., & Becker, T. (2016). Spinal motor neurons are regenerated  
1329 after mechanical lesion and genetic ablation in larval zebrafish. *Development*  
1330 *(Cambridge)*, 143(9), 1464–1474. <https://doi.org/10.1242/dev.129155>
- 1331 Ohno, M., Nikaido, M., Horiuchi, N., Kawakami, K., & Hatta, K. (2021). The enteric nervous  
1332 system in zebrafish larvae can regenerate via migration into the ablated area and  
1333 proliferation of neural crest-derived cells. *Development*, 148(2), dev195339.  
1334 <https://doi.org/10.1242/dev.195339>
- 1335 Paredes, A. D., Benavidez, D., Cheng, J., Mangos, S., Patil, R., Donoghue, M., Benedetti, E., &  
1336 Bartholomew, A. (2019). The Effect of Fluence on Macrophage Kinetics, Oxidative  
1337 Stress, and Wound Closure Using Real-Time In Vivo Imaging. *Photobiomodulation,*  
1338 *Photomedicine, and Laser Surgery*, 37(1), 45–52.  
1339 <https://doi.org/10.1089/photob.2018.4494>
- 1340 Parichy, D. M., Elizondo, M. R., Mills, M. G., Gordon, T. N., & Engeszer, R. E. (2009). Normal

- 1341 table of postembryonic zebrafish development: Staging by externally visible anatomy of  
1342 the living fish. *Developmental Dynamics*, 238(12), 2975–3015.  
1343 <https://doi.org/10.1002/dvdy.22113>
- 1344 Paul, S., Schindler, S., Giovannone, D., de Millo Terrazzani, A., Mariani, F. V., & Crump, J. G.  
1345 (2016). Ihha induces hybrid cartilage-bone cells during zebrafish jawbone regeneration.  
1346 *Development (Cambridge, England)*, 143(12), 2066–2076.  
1347 <https://doi.org/10.1242/dev.131292>
- 1348 Peri, F., & Nüsslein-Volhard, C. (2008). Live Imaging of Neuronal Degradation by Microglia  
1349 Reveals a Role for v0-ATPase a1 in Phagosomal Fusion In Vivo. *Cell*, 133(5), 916–927.  
1350 <https://doi.org/10.1016/j.cell.2008.04.037>
- 1351 Peti-Peterdi, J., Kidokoro, K., & Riquier-Brison, A. (2016). Intravital imaging in the kidney. In  
1352 *Current Opinion in Nephrology and Hypertension* (Vol. 25, Issue 3, pp. 168–173).  
1353 Lippincott Williams and Wilkins. <https://doi.org/10.1097/MNH.0000000000000219>
- 1354 Petrie, T. A., Strand, N. S., Yang, C.-T., Tsung-Yang, C., Rabinowitz, J. S., & Moon, R. T. (2014).  
1355 Macrophages modulate adult zebrafish tail fin regeneration. *Development (Cambridge,*  
1356 *England)*, 141(13), 2581–2591. <https://doi.org/10.1242/dev.098459>
- 1357 Pettit, A. R., Chang, M. K., Hume, D. A., & Raggatt, L.-J. (2008). Osteal macrophages: A new  
1358 twist on coupling during bone dynamics. *Bone*, 43(6), 976–982.  
1359 <https://doi.org/10.1016/j.bone.2008.08.128>
- 1360 Phan, Q. T., Liu, R., Tan, W. H., Imangali, N., Cheong, B., Scharl, M., & Winkler, C. (2020).  
1361 Macrophages Switch to an Osteo-Modulatory Profile Upon RANKL Induction in a  
1362 Medaka (*Oryzias latipes*) Osteoporosis Model. *JBMR Plus*, 4(11).  
1363 <https://doi.org/10.1002/jbm4.10409>
- 1364 Phan, Q. T., Tan, W. H., Liu, R., Sundaram, S., Buettner, A., Kneitz, S., Cheong, B., Vyas, H.,  
1365 Mathavan, S., Scharl, M., & Winkler, C. (2020). Cxcl9l and Cxcr3.2 regulate recruitment  
1366 of osteoclast progenitors to bone matrix in a medaka osteoporosis model. *Proceedings*  
1367 *of the National Academy of Sciences of the United States of America*, 117(32), 19276–  
1368 19286. <https://doi.org/10.1073/pnas.2006093117>
- 1369 Purwar, R., Kraus, M., Werfel, T., & Wittmann, M. (2008). Modulation of keratinocyte-

- 1370 derived MMP-9 by IL-13: A possible role for the pathogenesis of epidermal  
1371 inflammation. *Journal of Investigative Dermatology*, 128(1), 59–66.  
1372 <https://doi.org/10.1038/sj.jid.5700940>
- 1373 Quinn, J. M. W., Neale, S., Fujikawa, Y., McGee, J. D., & Athanasou, N. A. (1998). Human  
1374 osteoclast formation from blood monocytes, peritoneal macrophages, and bone  
1375 marrow cells. *Calcified Tissue International*, 62(6), 527–531.  
1376 <https://doi.org/10.1007/s002239900473>
- 1377 Redd, M. J., Kelly, G., Dunn, G., Way, M., & Martin, P. (2006). Imaging macrophage  
1378 chemotaxis in vivo: Studies of microtubule function in zebrafish wound inflammation.  
1379 *Cell Motility and the Cytoskeleton*, 63(7), 415–422. <https://doi.org/10.1002/cm.20133>
- 1380 Renshaw, S. A., Loynes, C. A., Trushell, D. M. I., Elworthy, S., Ingham, P. W., & Whyte, M. K.  
1381 B. (2006). A transgenic zebrafish model of neutrophilic inflammation. *Blood*, 108(13),  
1382 3976–3978. <https://doi.org/10.1182/blood-2006-05-024075>
- 1383 Renshaw, S. A., & Trede, N. S. (2012). A model 450 million years in the making: zebrafish and  
1384 vertebrate immunity. *Disease Models & Mechanisms*, 5(1), 38–47.  
1385 <https://doi.org/10.1242/dmm.007138>
- 1386 Rhen, T., & Cidlowski, J. A. (2005). Antiinflammatory Action of Glucocorticoids — New  
1387 Mechanisms for Old Drugs. *New England Journal of Medicine*, 353(16), 1711–1723.  
1388 <https://doi.org/10.1056/NEJMra050541>
- 1389 Robertson, A. L., Ogryzko, N. V., Henry, K. M., Loynes, C. A., Foulkes, M. J., Meloni, M. M.,  
1390 Wang, X., Ford, C., Jackson, M., Ingham, P. W., Wilson, H. L., Farrow, S. N., Solari, R.,  
1391 Flower, R. J., Jones, S., Whyte, M. K. B., & Renshaw, S. A. (2016). Identification of  
1392 benzopyrone as a common structural feature in compounds with anti-inflammatory  
1393 activity in a zebrafish phenotypic screen. *Disease Models & Mechanisms*, 9(6), 621–632.  
1394 <https://doi.org/10.1242/dmm.024935>
- 1395 Robinson, J. M. (2008). Reactive oxygen species in phagocytic leukocytes. In *Histochemistry*  
1396 *and Cell Biology* (Vol. 130, Issue 2, pp. 281–297). Springer.  
1397 <https://doi.org/10.1007/s00418-008-0461-4>
- 1398 Romero, M. M. G., McCathie, G., Jankun, P., & Roehl, H. H. (2018). Damage-induced reactive

- 1399 oxygen species enable zebrafish tail regeneration by repositioning of Hedgehog  
1400 expressing cells. *Nature Communications*, 9(1), 1–11. [https://doi.org/10.1038/s41467-](https://doi.org/10.1038/s41467-018-06460-2)  
1401 018-06460-2
- 1402 Rosowski, E. E. (2020). Determining macrophage versus neutrophil contributions to innate  
1403 immunity using larval zebrafish. In *Disease models & mechanisms* (Vol. 13, Issue 1).  
1404 NLM (Medline). <https://doi.org/10.1242/dmm.041889>
- 1405 Roy, S., Khanna, S., Nallu, K., Hunt, T. K., & Sen, C. K. (2006). Dermal wound healing is  
1406 subject to redox control. *Molecular Therapy*, 13(1), 211–220.  
1407 <https://doi.org/10.1016/j.ymthe.2005.07.684>
- 1408 Ru, J. ying, & Wang, Y. fen. (2020). Osteocyte apoptosis: the roles and key molecular  
1409 mechanisms in resorption-related bone diseases. In *Cell Death and Disease* (Vol. 11,  
1410 Issue 10, pp. 1–24). Springer Nature. <https://doi.org/10.1038/s41419-020-03059-8>
- 1411 Russo-Marie, F. (1992). Macrophages and the glucocorticoids. *Journal of Neuroimmunology*,  
1412 40(2–3), 281–286. <http://www.ncbi.nlm.nih.gov/pubmed/1430158>
- 1413 Sanderson, L. E., Chien, A.-T., Astin, J. W., Crosier, K. E., Crosier, P. S., & Hall, C. J. (2015). An  
1414 inducible transgene reports activation of macrophages in live zebrafish larvae.  
1415 *Developmental and Comparative Immunology*, 53(1), 63–69.  
1416 <https://doi.org/10.1016/j.dci.2015.06.013>
- 1417 Serbedzija, G. N., Chen, J., & Fishman, M. C. (1998). Regulation in the heart field of zebrafish.  
1418 *Development*, 125, 1095–1101.
- 1419 Serowoky, M. A., Arata, C. E., Crump, J. G., & Mariani, F. V. (2020). Skeletal stem cells:  
1420 Insights into maintaining and regenerating the skeleton. In *Development (Cambridge)*  
1421 (Vol. 147, Issue 5). Company of Biologists Ltd. <https://doi.org/10.1242/dev.179325>
- 1422 Sharif, F., de Bakker, M. A. G., & Richardson, M. K. (2014). Osteoclast-like Cells in Early  
1423 Zebrafish Embryos. *Cell Journal*, 16(2), 211–224.  
1424 <http://www.ncbi.nlm.nih.gov/pubmed/24567948>
- 1425 Sharif, F., Steenbergen, P. J., Metz, J. R., & Champagne, D. L. (2015). Long-lasting effects of  
1426 dexamethasone on immune cells and wound healing in the zebrafish. *Wound Repair*

- 1427            *and Regeneration*, 23(6), 855–865. <https://doi.org/10.1111/wrr.12366>
- 1428    Shiflett, L. A., Tiede-Lewis, L. A. M., Xie, Y., Lu, Y., Ray, E. C., & Dallas, S. L. (2019). Collagen  
1429            Dynamics During the Process of Osteocyte Embedding and Mineralization. *Frontiers in*  
1430            *Cell and Developmental Biology*, 7. <https://doi.org/10.3389/fcell.2019.00178>
- 1431    Schwartz, A., Goessling, W., & Yin, C. (2019). Macrophages in Zebrafish Models of Liver  
1432            Diseases. In *Frontiers in immunology* (Vol. 10, p. 2840). NLM (Medline).  
1433            <https://doi.org/10.3389/fimmu.2019.02840>
- 1434    Sieger, D., Moritz, C., Ziegenhals, T., Prykhozij, S., & Peri, F. (2012). Long-Range Ca<sup>2+</sup> Waves  
1435            Transmit Brain-Damage Signals to Microglia. *Developmental Cell*, 22(6), 1138–1148.  
1436            <https://doi.org/10.1016/j.devcel.2012.04.012>
- 1437    Sinder, B. P., Pettit, A. R., & McCauley, L. K. (2015). Macrophages: Their Emerging Roles in  
1438            Bone. *Journal of Bone and Mineral Research : The Official Journal of the American*  
1439            *Society for Bone and Mineral Research*, 30(12), 2140–2149.  
1440            <https://doi.org/10.1002/jbmr.2735>
- 1441    Singh, S. P., Holdway, J. E., & Poss, K. D. (2012). Regeneration of amputated zebrafish fin  
1442            rays from de novo osteoblasts. *Developmental Cell*, 22(4), 879–886.  
1443            <https://doi.org/10.1016/j.devcel.2012.03.006>
- 1444    Singleman, C., & Holtzman, N. G. (2014). Growth and maturation in the zebrafish, Danio  
1445            Rerio: A staging tool for teaching and research. *Zebrafish*, 11(4), 396–406.  
1446            <https://doi.org/10.1089/zeb.2014.0976>
- 1447    Smutny, M., Behrndt, M., Campinho, P., Ruprecht, V., & Heisenberg, C. P. (2015). UV laser  
1448            ablation to measure cell and tissue-generated forces in the zebrafish embryo in vivo  
1449            and ex vivo. *Methods in Molecular Biology*, 1189, 219–235.  
1450            [https://doi.org/10.1007/978-1-4939-1164-6\\_15](https://doi.org/10.1007/978-1-4939-1164-6_15)
- 1451    Sousa, S., Afonso, N., Bensimon-Brito, A., Fonseca, M., Simões, M., Leon, J., Roehl, H.,  
1452            Cancela, M. L., Jacinto, A., Amsterdam, A., Chung, B.-C., Westerfield, M., Haffter, P.,  
1453            Hopkins, N., Kimmel, C., Postlethwait, J. H., & Nissen, R. (2011). Differentiated skeletal  
1454            cells contribute to blastema formation during zebrafish fin regeneration. *Development*  
1455            *(Cambridge, England)*, 138(18), 3897–3905. <https://doi.org/10.1242/dev.064717>



- 1456 Sousa, S., Valerio, F., & Jacinto, A. (2012). A new zebrafish bone crush injury model. *Biology*  
1457 *Open*, 1(9), 915–921. <https://doi.org/10.1242/bio.2012877>
- 1458 Spoorendonk, K. M., Peterson-Maduro, J., Renn, J., Trowe, T., Kranenborg, S., Winkler, C., &  
1459 Schulte-Merker, S. (2008). Retinoic acid and Cyp26b1 are critical regulators of  
1460 osteogenesis in the axial skeleton. *Development*, 135(22), 3765–3774.  
1461 <https://doi.org/10.1242/dev.024034>
- 1462 Stout, R. D., Jiang, C., Matta, B., Tietzel, I., Watkins, S. K., & Suttles, J. (2005). Macrophages  
1463 sequentially change their functional phenotype in response to changes in  
1464 microenvironmental influences. *Journal of Immunology (Baltimore, Md. : 1950)*, 175(1),  
1465 342–349. <https://doi.org/10.4049/JIMMUNOL.175.1.342>
- 1466 Suarez-Bregua, P., Saxena, A., Bronner, M. E., & Rotllant, J. (2017). Targeted Pth4-expressing  
1467 cell ablation impairs skeletal mineralization in zebrafish. *PLoS ONE*, 12(10).  
1468 <https://doi.org/10.1371/journal.pone.0186444>
- 1469 Takayanagi, H. (2007). Osteoimmunology: shared mechanisms and crosstalk between the  
1470 immune and bone systems. *Nature Reviews Immunology*, 7(4), 292–304.  
1471 <https://doi.org/10.1038/nri2062>
- 1472 Tan, H. Y., Wang, N., Li, S., Hong, M., Wang, X., & Feng, Y. (2016). The Reactive Oxygen  
1473 Species in Macrophage Polarization: Reflecting Its Dual Role in Progression and  
1474 Treatment of Human Diseases. In *Oxidative Medicine and Cellular Longevity* (Vol. 2016).  
1475 <https://doi.org/10.1155/2016/2795090>
- 1476 Tarasco, M., Laizé, V., Cardeira, J., Cancela, M. L., & Gavaia, P. J. (2017). The zebrafish  
1477 operculum: A powerful system to assess osteogenic bioactivities of molecules with  
1478 pharmacological and toxicological relevance. *Comparative Biochemistry and*  
1479 *Physiology. Toxicology & Pharmacology : CBP*, 197, 45–52.  
1480 <https://doi.org/10.1016/j.cbpc.2017.04.006>
- 1481 Teh, C., Chudakov, D. M., Poon, K. L., Mamedov, I. Z., Sek, J. Y., Shidlovsky, K., Lukyanov, S.,  
1482 & Korzh, V. (2010). Optogenetic in vivo cell manipulation in KillerRed-expressing  
1483 zebrafish transgenics. *BMC Developmental Biology*, 10(1), 110.  
1484 <https://doi.org/10.1186/1471-213X-10-110>

- 1485 To, T. T., Witten, P. E., Huysseune, A., & Winkler, C. (2015). An adult osteopetrosis model in  
1486 medaka reveals the importance of osteoclast function for bone remodeling in teleost  
1487 fish. *Comparative Biochemistry and Physiology. Toxicology & Pharmacology : CBP*, *178*,  
1488 68–75. <https://doi.org/10.1016/j.cbpc.2015.08.007>
- 1489 Tokarz, D., Cisek, R., Wein, M. N., Turcotte, R., Haase, C., Yeh, S.-C. A., Bharadwaj, S.,  
1490 Raphael, A. P., Paudel, H., Alt, C., Liu, T.-M., Kronenberg, H. M., & Lin, C. P. (2017).  
1491 Intravital imaging of osteocytes in mouse calvaria using third harmonic generation  
1492 microscopy. *PLOS ONE*, *12*(10), e0186846.  
1493 <https://doi.org/10.1371/journal.pone.0186846>
- 1494 Tonelli, F., Cotti, S., Leoni, L., Besio, R., Gioia, R., Marchese, L., Giorgetti, S., Villani, S.,  
1495 Gistelink, C., Wagener, R., Kobbe, B., Fiedler, I. A. K., Larionova, D., Busse, B., Eyre, D.,  
1496 Rossi, A., Witten, P. E., & Forlino, A. (2020). Crtap and p3h1 knock out zebrafish support  
1497 defective collagen chaperoning as the cause of their osteogenesis imperfecta  
1498 phenotype. *Matrix Biology*, *90*, 40–60. <https://doi.org/10.1016/j.matbio.2020.03.004>
- 1499 Trede, N. S., Langenau, D. M., Traver, D., Look, A. T., & Zon, L. I. (2004). The use of zebrafish  
1500 to understand immunity. *Immunity*, *20*(4), 367–379.  
1501 <http://www.ncbi.nlm.nih.gov/pubmed/15084267>
- 1502 Walton, E. M., Cronan, M. R., Beerman, R. W., & Tobin, D. M. (2015). The Macrophage-  
1503 Specific Promoter mfap4 Allows Live, Long-Term Analysis of Macrophage Behavior  
1504 during Mycobacterial Infection in Zebrafish. *PLOS ONE*, *10*(10), e0138949.  
1505 <https://doi.org/10.1371/journal.pone.0138949>
- 1506 Wang, X., He, H., Tang, W., Zhang, X. A., & Hua, X. (2012). Two Origins of Blastemal  
1507 Progenitors Define Blastemal Regeneration of Zebrafish Lower Jaw. *PLoS ONE*, *7*(9),  
1508 45380. <https://doi.org/10.1371/journal.pone.0045380>
- 1509 Wauquier, F., Leotoing, L., Coxam, V., Guicheux, J., & Wittrant, Y. (2009). Oxidative stress in  
1510 bone remodelling and disease. In *Trends in Molecular Medicine* (Vol. 15, Issue 10, pp.  
1511 468–477). Elsevier Ltd. <https://doi.org/10.1016/j.molmed.2009.08.004>
- 1512 Weinstein, R. S. (2012). Glucocorticoid-induced osteoporosis and osteonecrosis.  
1513 *Endocrinology and Metabolism Clinics of North America*, *41*(3), 595–611.

- 1514 <https://doi.org/10.1016/j.ecl.2012.04.004>
- 1515 Witten, P. E., & Huysseune, A. (2009). A comparative view on mechanisms and functions of  
1516 skeletal remodelling in teleost fish, with special emphasis on osteoclasts and their  
1517 function. *Biological Reviews*, *84*(2), 315–346. [https://doi.org/10.1111/j.1469-](https://doi.org/10.1111/j.1469-185X.2009.00077.x)  
1518 [185X.2009.00077.x](https://doi.org/10.1111/j.1469-185X.2009.00077.x)
- 1519 Woodfin, A., Voisin, M.-B., Beyrau, M., Colom, B., Caille, D., Diapouli, F.-M., Nash, G. B.,  
1520 Chavakis, T., Albelda, S. M., Rainger, G. E., Meda, P., Imhof, B. A., & Nourshargh, S.  
1521 (2011). The junctional adhesion molecule JAM-C regulates polarized transendothelial  
1522 migration of neutrophils in vivo. *Nature Immunology*, *12*(8), 761–769.  
1523 <https://doi.org/10.1038/ni.2062>
- 1524 Wynn, T. A., Chawla, A., & Pollard, J. W. (2013). Macrophage biology in development,  
1525 homeostasis and disease. *Nature*, *496*(7446), 445–455.  
1526 <https://doi.org/10.1038/nature12034>
- 1527 Xie, Y., Tolmeijer, S., Oskam, J. M., Tonkens, T., Meijer, A. H., & Schaaf, M. J. M. (2019).  
1528 Glucocorticoids inhibit macrophage differentiation towards a pro-inflammatory  
1529 phenotype upon wounding without affecting their migration. *DMM Disease Models*  
1530 *and Mechanisms*, *12*(5). <https://doi.org/10.1242/dmm.037887>
- 1531 Yang, Y., Hippensteel, J. A., & Schmidt, E. P. (2018). Intravital microscopy in the mouse lung.  
1532 In *Methods in Molecular Biology* (Vol. 1809, pp. 331–339). Humana Press Inc.  
1533 [https://doi.org/10.1007/978-1-4939-8570-8\\_21](https://doi.org/10.1007/978-1-4939-8570-8_21)
- 1534 Yoo, S. K., Freisinger, C. M., LeBert, D. C., & Huttenlocher, A. (2012). Early redox, Src family  
1535 kinase, and calcium signaling integrate wound responses and tissue regeneration in  
1536 zebrafish. *Journal of Cell Biology*, *199*(2), 225–234.  
1537 <https://doi.org/10.1083/jcb.201203154>
- 1538 Zhang, H., Wang, X., Lyu, K., Gao, S., Wang, G., Fan, C., Zhang, X. A., & Yan, J. (2015). Time  
1539 point-based integrative analyses of deep-transcriptome identify four signal pathways in  
1540 blastemal regeneration of zebrafish lower jaw. *Stem Cells*, *33*(3), 806–818.  
1541 <https://doi.org/10.1002/stem.1899>
- 1542 Zhang, J., Jeradi, S., Strähle, U., & Akimenko, M. A. (2012). Laser ablation of the sonic

1543 hedgehog-a-expressing cells during fin regeneration affects ray branching  
1544 morphogenesis. *Developmental Biology*, 365(2), 424–433.  
1545 <https://doi.org/10.1016/j.ydbio.2012.03.008>

1546

1547 **Supplemental Information:**

Supplemental fig.1

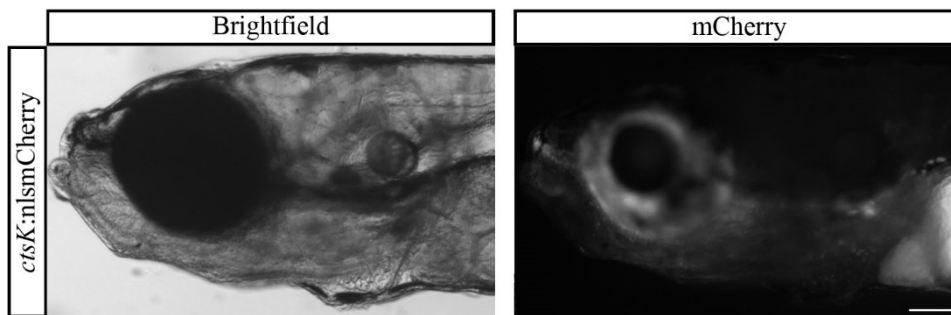

1549 **Fig. S1:** Representative whole-mount image of transgenic *ctsK:nlsmCherry* larval heads at 13  
1550 dpf. The staining is visible in the whole lower jaw region. Scale bar = 100  $\mu$ m. n = 2

Supplemental fig.2

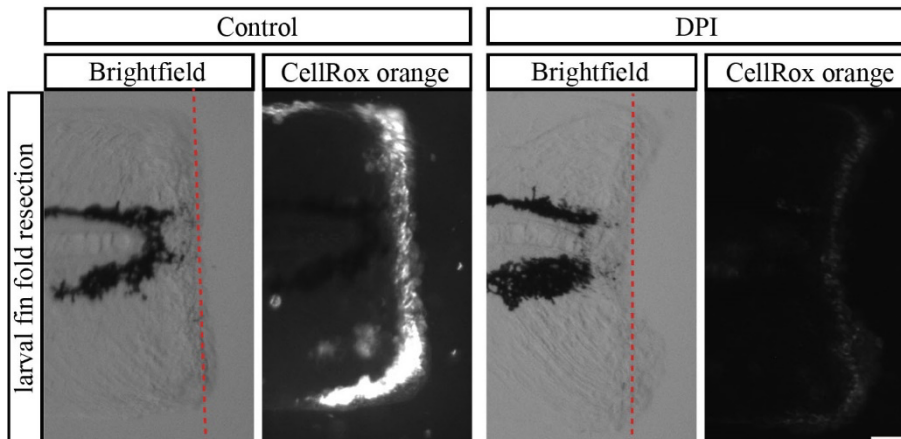

1552 **Fig. S2:** Representative whole-mount images of ROS production, indicated by CellROX orange  
1553 staining, 20 min after fin fold resection. The release of ROS can be blocked by a pre-treatment  
1554 with the antioxidant DPI (diphenyleneiodonium). Scale bar = 50  $\mu$ m. n = 6

Supplemental fig.3

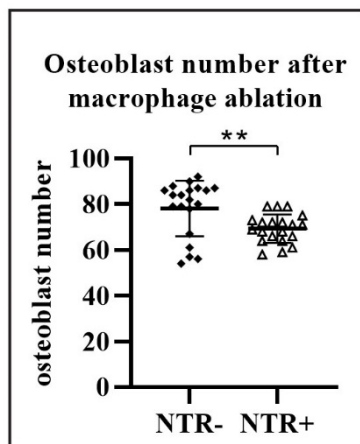

1555

1556 **Fig. S3:** Quantification of the number of osteoblasts on the uninjured opercle after ablation  
1557 of macrophages with NFP. *osterix*:RFP x *mpeg1*:YFP-NTR larvae and *mpeg1*:YFP-NTR negative  
1558 siblings were incubated for 6 days with NFP. A reduced number of osteoblasts at 9 dpf was  
1559 detected in case of macrophages ablation. n = 20.

1560 **Movie 1 (supplement to Fig. 2):** Movie showing a proliferating osteoblast in the opercle of  
1561 *osterix*:nGFP transgenic zebrafish after osteoblast ablation. The position of the proliferating  
1562 osteoblast is indicated by the white arrow. Division can be observed after roughly 4 h. Scale  
1563 bar = 10  $\mu$ m.

1564 **Movie 2 (supplement to Fig. 3C):** Movie showing absence of CellRox orange staining in a  
1565 transgenic 6 dpf *osterix*:nGFP zebrafish with osteoblast ablation. Scale bar = 10  $\mu$ m.

1566 **Movie 3 (supplement to Fig. 3C):** Movie showing increasing CellRox orange staining, as a  
1567 readout for ROS release, in a transgenic 6 dpf *osterix*:nGFP zebrafish after osteoblast ablation.  
1568 The increase of ROS is observed immediately lesion. Scale bar = 10  $\mu$ m.

1569 **Movie 4 (supplement to Fig. 4A):** Movie showing the recruitment of neutrophils, labeled in  
1570 magenta, into the area of osteoblast lesion. Scale bar = 10  $\mu$ m.

1571 **Movie 5 (supplement to Fig. 4C):** Movie showing the recruitment of macrophages, labeled in  
1572 magenta, into the area of osteoblast lesion. Scale bar = 10  $\mu$ m.

1573 **Movie 6 (supplement to Fig. 4E):** Movie showing the recruitment of macrophages from the  
1574 surrounding tissue and not from blood vessels after osteoblast lesion. Scale bar = 20  $\mu$ m.

1575 **Movie 7 (supplement to Fig. 6):** Movie showing the impaired recruitment of macrophages,  
1576 labeled in magenta, into the area of osteoblast lesion after pre-treatment with the  
1577 antioxidant DPI. Scale bar = 10  $\mu$ m.

1578 **Movie 8 (supplement to Fig. 7B):** Movie showing recruitment of macrophages, labeled in  
1579 magenta, into the area of osteoblast lesion after DMSO treatment. The response is  
1580 comparable to the untreated response observed in laser-ablated, otherwise untreated  
1581 zebrafish (see Movie 5). Scale bar = 10  $\mu$ m.

1582 **Movie 9 (supplement to Fig. 7B):** Movie showing reduced recruitment of macrophages,  
1583 labeled in magenta, into the area of osteoblast lesion after prednisolone treatment. Please  
1584 compare with the response in control treated (Movie 7) and untreated (see Movie 5)  
1585 individuals. Scale bar = 10  $\mu$ m.

1586 **Movie 10 (supplement to Fig. 8B):** Movie showing recruitment of macrophages, labeled in  
1587 magenta, into the area of a small osteoblast lesion after DMSO treatment. The response is  
1588 weaker compared to the response observed in the larger laser-ablated osteoblast lesioned,  
1589 otherwise untreated zebrafish (see Movie 5). Scale bar = 10  $\mu$ m.

1590 **Movie 11 (supplement to Fig. 8B):** Movie showing reduced recruitment of macrophages,  
1591 labeled in magenta, into the area of a small osteoblast lesion after prednisolone treatment.  
1592 Please compare with the response in control treated (Movie 9) and larger lesion prednisolone  
1593 treated (see Movie 8) individuals. Scale bar = 10  $\mu$ m.
